## RESEARCH ARTICLE

# GABA metabolism is crucial for long-term survival of anoxia in annual killifish embryos

Daniel E. Zajic<sup>1,2,\*</sup> and Jason E. Podrabsky<sup>1</sup>

## ABSTRACT

In most vertebrates, a lack of oxygen quickly leads to irreparable damages to vital organs, such as the brain and heart. However, there are some vertebrates that have evolved mechanisms to survive periods of no oxygen (anoxia). The annual killifish (*Austrofundulus limnaeus*) survives in ephemeral ponds in the coastal deserts of Venezuela and their embryos have the remarkable ability to tolerate anoxia for months. When exposed to anoxia, embryos of *A. limnaeus* respond by producing significant amounts of  $\gamma$ -aminobutyric acid (GABA). This study aims to understand the role of GABA in supporting the metabolic response to anoxia. To explore this, we investigated four developmentally distinct stages of *A. limnaeus* embryos that vary in their anoxia tolerance. We measured GABA and lactate concentrations across development in response to anoxia and aerobic recovery. We then inhibited enzymes responsible for the production and degradation of GABA and observed GABA and lactate concentrations, as well as embryo mortality. Here, we show for the first time that GABA metabolism affects anoxia tolerance in *A. limnaeus* embryos. Inhibition of enzymes responsible for GABA production (glutamate decarboxylase) and degradation (GABA-transaminase and succinic acid semialdehyde dehydrogenase) led to increased mortality, supporting a role for GABA as an intermediate product and not a metabolic end-product. We propose multiple roles for GABA during anoxia and aerobic recovery in *A. limnaeus* embryos, serving as a neurotransmitter, an energy source, and an anti-oxidant.

**KEY WORDS:** Aerobic recovery, Anoxia, *Austrofundulus limnaeus*, GABA, Lactate, Metabolism

## INTRODUCTION

In most organisms, even brief episodes of low oxygen can cause irreparable damage to vital organs, such as the brain and heart (Larson et al., 2014). Few vertebrates are able to survive long bouts of anoxia, while even fewer are able to thrive and recover from anoxic stress. A small number of vertebrates have evolved the ability to tolerate long-term anoxia, and these organisms share a number of physiological, cellular and biochemical characteristics that appear to be of fundamental importance for survival without oxygen (Bundgaard et al., 2020; Podrabsky et al., 2007; Riggs et al., 2018; Thompson et al., 2013). One common feature found in all groups of anoxia-tolerant vertebrates is the production of

$\gamma$ -aminobutyric acid (GABA), an inhibitory neurotransmitter, in response to anoxia (Hylland and Nilsson, 1999; Nilsson and Lutz, 1991). GABA production in the brain during anoxia is thought to protect against excitotoxic cell death and, generally, relatively small concentrations of GABA (micromolar) are required to achieve neuroprotection (Gilby et al., 2005; Johns et al., 2000; Lutz and Milton, 2004; Pamerter et al., 2011). Embryos of the annual killifish, *Austrofundulus limnaeus*, can survive for months without oxygen, and long-term survival of anoxia is associated with accumulation of millimolar quantities of GABA (Podrabsky et al., 2007). The accumulation of high concentrations of GABA in anoxic embryos of *A. limnaeus* suggests a role beyond neurotransmission. In this paper we explore the potential role of GABA production in supporting long-term survival of anoxia in *A. limnaeus* embryos.

*Austrofundulus limnaeus* survives in ephemeral ponds in the coastal deserts of Venezuela by producing embryos that arrest development in diapause as a part of their normal development (Podrabsky and Hand, 1999). Embryos can enter diapause at up to three unique developmental stages, termed diapause (D) I, II and III, which together extend the time for embryonic development to span the duration of the dry season (Podrabsky et al., 2017; Wourms, 1972a,b). Unlike most developing embryos, *A. limnaeus* displays an increase in anoxia tolerance during development, which peaks at diapause II (DII; 24–32 days post-fertilization, dpf), is maintained for several days after embryos exit from DII, and then decreases as embryos develop towards hatching (Meller et al., 2012; Podrabsky et al., 2007; Riggs and Podrabsky, 2017). At their peak anoxia tolerance, embryos have the remarkable ability to tolerate anoxic conditions for months at 25°C – two orders of magnitude higher than any other vertebrate (Podrabsky et al., 1998, 2012b). What is astounding is that the most anoxia-tolerant stages, DII and 4 days post-diapause II (dpd) (Wourms' stage 36), are composed mostly of characteristically anoxia-sensitive cardiac tissue (functional heart) and neural tissue (Podrabsky and Hand, 1999; Podrabsky et al., 2007). Survival in anoxia is attributed to the ability of embryos to substantially decrease metabolism, either by already being metabolically dormant (in diapause), or through rapidly decreasing metabolism by entering anoxia-induced quiescence (Podrabsky et al., 2012a). Thus, *A. limnaeus* provides a gradient of anoxia-tolerant and anoxia-sensitive stages, which allows for a comparative study within a single system.

Without oxygen, organisms must shift to anaerobic pathways as a means of supporting catabolic metabolism. Most vertebrates rely on anaerobic glycolysis and the production of lactate to fuel metabolism in the absence of oxygen. In most organisms facing anoxia, a lack of adequate glycolytic ATP production to meet metabolic demand leads to a bioenergetic and redox imbalance and the activation of cell-death pathways (Boutillier, 2001; Jacobson and Raff, 1995). Even if metabolic supply and demand are balanced, survival times in anoxia are typically limited by the negative effects of lactic acidosis, which can be partially offset through increased

<sup>1</sup>Department of Biology, Portland State University, PO Box 751, Portland, OR 97207, USA. <sup>2</sup>Health, Human Performance, and Athletics Department, Linfield University, 900 SE Baker, McMinnville, OR 97128, USA.

\*Author for correspondence (dzajic@linfield.edu)

 D.E.Z., 0000-0002-3299-4113; J.E.P., 0000-0003-1411-8547

**List of abbreviations**

|                  |                                                 |
|------------------|-------------------------------------------------|
| DAO              | diamine oxidase                                 |
| DEAB             | <i>N,N</i> -diethylaminobenzaldehyde            |
| DII              | diapause II                                     |
| DMSO             | dimethyl sulfoxide                              |
| dpd              | days post-diapause II                           |
| dpf              | days post-fertilization                         |
| EKP              | ethyl ketopentenoate                            |
| FPKM             | fragments per kilobase per million mapped reads |
| GABA             | $\gamma$ -aminobutyric acid                     |
| GABA-T           | GABA transaminase                               |
| GAD              | glutamate decarboxylase                         |
| GAT              | GABA transporter                                |
| LDH              | lactate dehydrogenase                           |
| LT <sub>50</sub> | lethal time to 50% mortality                    |
| MCT              | monocarboxylate transporter                     |
| ROS              | reactive oxygen species                         |
| SSADH            | succinic acid semialdehyde dehydrogenase        |
| SSAL             | succinic semialdehyde                           |
| WS               | Wourms' stage                                   |

buffering capacity (Jackson, 1997; Jackson et al., 2000). The ability for *A. limnaeus* embryos to maintain high [ATP]/[ADP] ratios during diapause supports a coordinated downregulation of ATP production and consumption, and is likely a key to the ability of embryos to survive long bouts without oxygen during diapause. However, ATP levels are not maintained in developing embryos exposed to anoxia (Podrabsky et al., 2012a), and yet these embryos exhibit similar survival of anoxia (Podrabsky et al., 2007). Thus, in *A. limnaeus* there may be multiple mechanisms for achieving extreme anoxia tolerance. Recent progress has been made on understanding multiple factors that may be contributing to the survival of *A. limnaeus* in anoxia (depressed protein synthesis, inhibition of apoptosis, anti-oxidant capacity and small non-coding RNAs) (Meller and Podrabsky, 2013; Podrabsky and Hand, 2000; Riggs and Podrabsky, 2017; Wagner et al., 2019).

When exposed to anoxia, embryos of *A. limnaeus* respond by producing large amounts (>10 mmol l<sup>-1</sup>) of GABA (Podrabsky et al., 2007). GABA is the primary inhibitory neurotransmitter in the adult central nervous system; however, it appears to function in an excitatory manner during early vertebrate development (Ben-Ari, 2002). The high levels of GABA produced in anoxic embryos of *A. limnaeus* suggest a role beyond inhibitory neurotransmission. Despite the massive accumulation of GABA in *A. limnaeus* embryos, the metabolic origins and function of GABA in *A. limnaeus* embryos remain unexplored.

Here we report on the long-term metabolic responses of dormant (DII) and actively developing post-DII embryos to anoxia and aerobic recovery to evaluate the role of GABA. We evaluate these data in relation to anoxia tolerance by utilizing developmental stages that provide a gradient of anoxia tolerance. We inhibit enzymes responsible for GABA production and degradation to see how GABA and lactate levels are affected, and how that affects survival in anoxia. These data support a role for GABA as a metabolic intermediate, and not a metabolic end-product. Here we suggest multiple roles for GABA during anoxia and aerobic recovery in *A. limnaeus* embryos: as a neurotransmitter, as a source of energy, and as an anti-oxidant. We support our findings with transcript expression data during normal *A. limnaeus* embryonic development and in response to anoxia and aerobic recovery. We explore how long-term survival in anoxia and subsequent aerobic

recovery may be supported by accumulation of GABA. Understanding how the most anoxia-tolerant stages, composed mostly of cardiac tissue and neural tissue, utilize GABA may provide insight into how these tissues are able to survive long-term anoxia.

**MATERIALS AND METHODS****Husbandry of *A. limnaeus* and embryo collection**

Adult annual killifish (*Austrofundulus limnaeus* L. P. Schultz 1949) were reared in the Portland State University (PSU) aquatic vertebrate facility and cared for according to established husbandry methods in accordance with approved PSU Institutional Animal Care and Use Committee protocols (PSU IACUC protocols nos. 33 and 64). Adult *A. limnaeus* were kept in spawning pairs and housed in 9.5 liter tanks, and collectively 21 tanks were connected to a communal sump and filtration system. Paired adults were allowed to spawn semi-weekly and embryos were collected. Embryos were stored at 25°C under dark conditions in 15 mm × 100 mm plastic Petri dishes in media that resembles the environmental conditions from which adults were collected in 1995 (10 mmol l<sup>-1</sup> NaCl, 2.15 mmol l<sup>-1</sup> MgCl<sub>2</sub>, 0.8 mmol l<sup>-1</sup> CaCl<sub>2</sub>, 0.14 mmol l<sup>-1</sup> KCl, 1.3 mmol l<sup>-1</sup> MgSO<sub>4</sub>) (Podrabsky, 1999; Podrabsky et al., 1998). Embryo medium contained Methylene Blue (0.0001%) for the first 4 days post-fertilization (dpf) to prevent fungal growth. To prevent microbial growth and infection, embryos were treated at 4 dpf with two 5 min rinses of embryo medium containing sodium hypochlorite (Clorox, 0.03%) separated by a 5 min rest in embryo medium without sodium hypochlorite. After the last sodium hypochlorite wash, embryos were rinsed with embryo medium containing sodium thiosulfate (0.005%) to neutralize remaining sodium hypochlorite. Embryos were then placed in medium containing 10 mg l<sup>-1</sup> gentamicin sulfate and allowed to develop at 25°C without light to promote entry into DII and prevent breaking of DII until experiments were conducted (28–66 days) (Podrabsky et al., 2010; Romney et al., 2018). Embryos enter DII at around 24 dpf at 25°C.

**Developmental staging and sampling of embryos**

Diapause II was broken by subjecting embryos to a temperature of 30°C and full spectrum light for 48 h (Meller et al., 2012). Upon breaking DII, embryos were sorted by developmental stage according to Wourms' stage (WS) in concert with recent adaptations by Podrabsky et al. (2017) (Wourms, 1972a,b). Experiments were performed on four stages of embryos to capture a gradient of anoxia tolerance levels and physiology: DII (WS 32/33), WS 36 (4 days post-DII, dpd), WS 40 (12 dpd) and WS 42 (20 dpd). DII embryos are metabolically dormant and have arrested development and are thus primed for anoxia, whereas post-DII embryos are metabolically and developmentally active and enter quiescence in response to anoxia (Podrabsky et al., 2007). Lethal time to 50% mortality (LT<sub>50</sub>) in response to anoxia has previously been described (Meller et al., 2012; Podrabsky et al., 2007; Riggs and Podrabsky, 2017). Embryos develop anoxia tolerance as they enter DII (LT<sub>50</sub>=65 days) and maintain extreme tolerance for 4–6 days after breaking DII, after which anoxia tolerance decreases dramatically in later stage embryos: WS 36 (LT<sub>50</sub>=74 days), WS 40 (LT<sub>50</sub>=7 days) and WS 42 (LT<sub>50</sub>=0.67 days). Embryos were sampled in their respective environmental conditions (anoxia or normoxia) by placing them on a mesh screen and wicking away excess liquid using dry paper towels prior to being placed in a pre-weighed microcentrifuge tube. Samples were then quickly weighed and stored at -80°C until metabolite extraction. Typically, embryos

were used from a single spawning event to represent a single replicate; however, in some instances multiple spawning events were combined in order to have sufficient embryos at a specific developmental stage ( $N=3-6$ ). Sampling of embryos covered the lifespan of *A. limnaeus* and multiple generations; however, control embryos were always sampled to account for any batch or generational effects.

### Long-term anoxia exposure, recovery and sampling

Embryos were exposed to various periods of anoxia based on their anoxia tolerance, such that the longest period of anoxia matched their  $LT_{50}$  (Fig. 1A). Embryos were allowed to recover following long-term anoxia and samples were collected at several time points following aerobic recovery. WS 42 embryos either hatched or were not able to recover following re-oxygenation and data for recovery

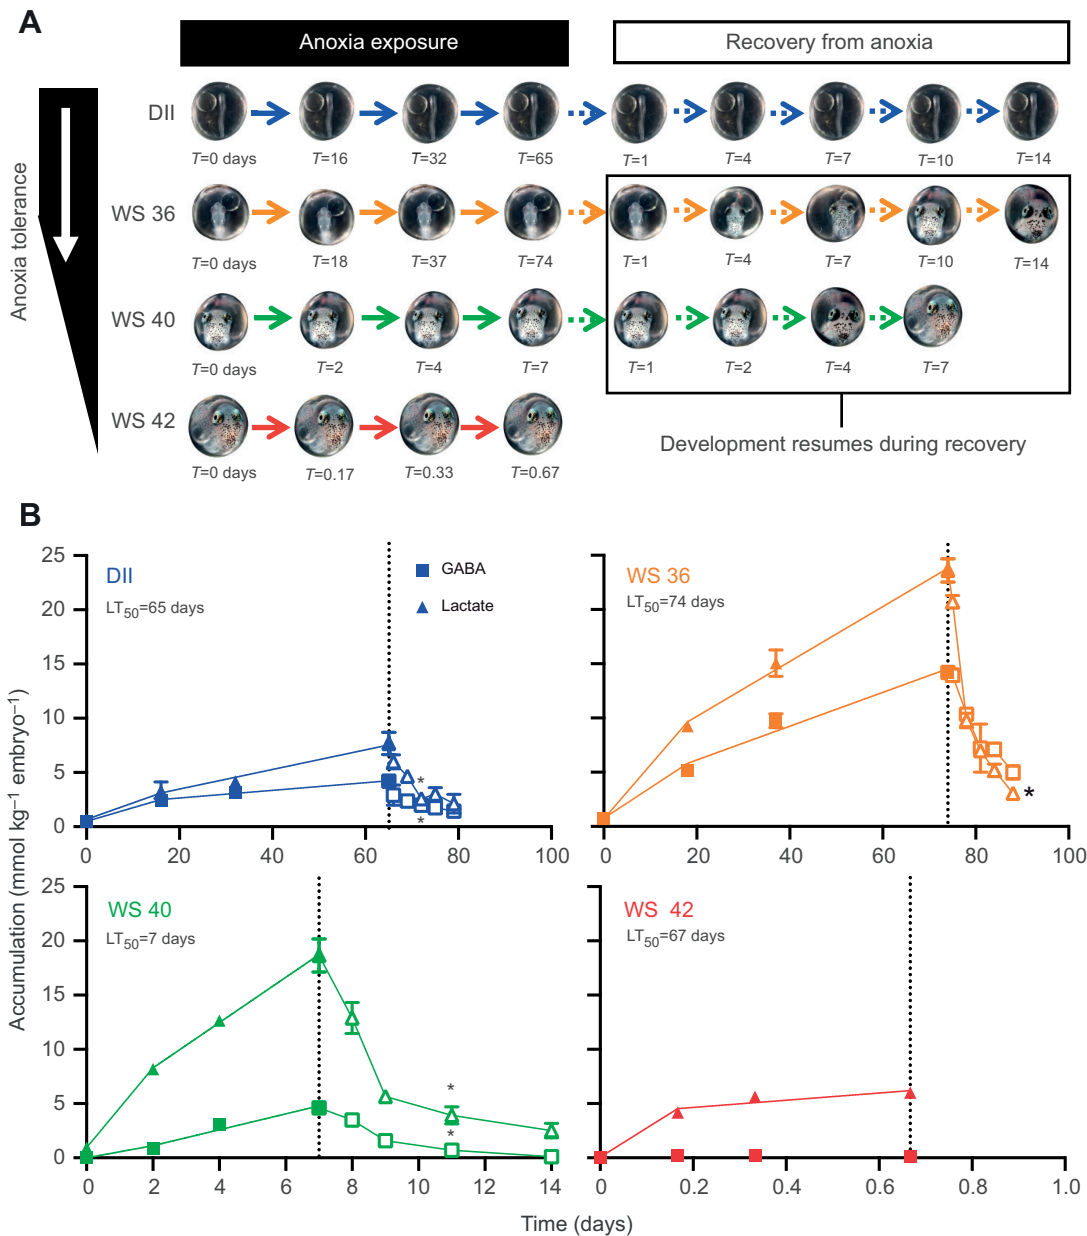

**Fig. 1. GABA and lactate accumulation in embryos of *Austrofundulus limnaeus* during exposure to anoxia and aerobic recovery from anoxia at 25°C.** (A) Schematic showing the experimental design and sampling regimen used. Embryos from four developmental stages were sampled at their lethal time to 50% mortality ( $LT_{50}$ ) in anoxia, and at  $LT_{50}/2$  and  $LT_{50}/4$  (Meller et al., 2012; Podrabsky et al., 2007; Riggs and Podrabsky, 2017). Following exposure to anoxia, embryos were sampled during aerobic recovery from anoxia for up to 14 days. WS 42 embryos did not recover from anoxia and thus samples were not collected. DII embryos (WS 32/33) remained in diapause during recovery, whereas WS 36 and WS 40 embryos resumed development. Arrow colors match the colors used in subsequent figures for each developmental stage. WS, Wourms' stage; DII, diapause II. (B) Accumulation of lactate and GABA during anoxia and aerobic recovery from anoxia. Vertical dotted lines indicate the  $LT_{50}$  of each developmental stage. Filled symbols indicate time points in anoxia and open symbols indicate time points during aerobic recovery. Each replicate consists of five embryos. Symbols represent means  $\pm$  s.e.m. ( $N=4$  for DII, WS 36 and WS 40;  $N=3$  for WS 42). ANOVA ( $P<0.0001$ ) indicates a significant accumulation of GABA and lactate for DII, WS 36 and WS 40 embryos, while only lactate accumulated in WS 42 embryos. \*First time points in recovery that were not significantly different from  $T=0$  (Dunnett's *post hoc* test,  $P<0.05$ ). Rates of GABA and lactate accumulation were calculated from the slopes of metabolite concentrations during exposure to anoxia. For each developmental stage, initial and final slopes were calculated using segmental linear regression. See Table 1 for results of regression analyses.



were not collected. Embryos were exposed to anoxia in a Bactron III anaerobic chamber (Sheldon Manufacturing, Cornelius, OR, USA), which maintained anoxic conditions by using hydrogen gas and a palladium catalyst to react with any trace oxygen. Anoxic conditions were maintained at 5% CO<sub>2</sub>, 5% H<sub>2</sub> and 90% N<sub>2</sub> with temperature held constant at 25°C with no light. Embryos were first removed from their normoxic medium, transferred into the chamber through an air lock, and placed in anoxic medium that had been previously bubbled with N<sub>2</sub> gas for 30 min and equilibrated overnight to conditions in the anoxic chamber. Samples were collected as biological replicates consisting of five embryos each ( $N=4$  for DII, WS 36 and WS 40;  $N=3$  for WS 42).

### Pharmacological inhibition of GABA synthesis and degradation

Three inhibitors of canonical GABA synthesis and degradation were used. Ethyl ketopentenoate (EKP) is a lipid-permeable and specific inhibitor of glutamate decarboxylase (GAD) (Zhang et al., 2017). Inhibition of GAD occurs through binding of EKP to the native glutamate active site of both isoforms of GAD (GAD67 and GAD65). EKP was synthesized and gifted to us from Dr Peter A. M. de Witte and his laboratory (KU Leuven, Leuven, Belgium). Vigabatrin (vinyl- $\gamma$ -aminobutyric acid) (V8261, Sigma-Aldrich, St Louis, MO, USA) is a selective, irreversible inhibitor of GABA transaminase (GABA-T; ABAT), the major enzyme that synthesizes the first step in the metabolic degradation of GABA (Ben-Menachem, 2011; Qume and Fowler, 1997; Sloley et al., 1994; Wu et al., 2001). *N,N*-diethylaminobenzaldehyde (DEAB) (D86256, Sigma-Aldrich) is a selective inhibitor of aldehyde dehydrogenase isoenzymes (Koppaka et al., 2012; Morgan et al., 2015). Succinic acid semialdehyde dehydrogenase (SSADH) is part of the aldehyde dehydrogenase 5 family (ALDH5A1), a target of DEAB (Morgan et al., 2015). Embryos of *A. limnaeus* are generally highly impermeable to external substances. Consequently, higher concentrations of inhibitors and the addition of dimethyl sulfoxide (DMSO) in the embryo medium were used to achieve biologically active concentrations within embryos (Podrabsky and Hand, 2000; Pri-Tal et al., 2011; Woll and Podrabsky, 2017). Stocks of pharmacological inhibitors were prepared in DMSO and diluted in embryo medium without antibiotics, yielding a final concentration of 1% DMSO. The final concentrations of inhibitors used in the experiments were: 400 and 800  $\mu\text{mol l}^{-1}$  EKP; 1  $\text{mmol l}^{-1}$  vigabatrin; 167  $\mu\text{mol l}^{-1}$  DEAB. Preliminary range-finding experiments were used to determine these concentrations in addition to observed concentrations used in the literature. The potential toxicity of each of the inhibitors was tested on WS 36 embryos. Embryos were treated with each of the inhibitors in normoxia and monitored for at least 7 days with daily media changes to observe any developmental defects or mortality. For anoxic exposures, groups of 15 WS 36 embryos ( $N=3$ ) were placed in clear 12-well polystyrene plates (CytoOne, CC7682-7512, USA Scientific, Ocala, FL, USA) and pre-exposed to embryo medium containing each inhibitor for 2 h at 25°C without light. Embryos were then transferred into the anoxic chamber where fresh anoxic embryo medium containing each inhibitor was replenished. Concentrated stock solutions (EKP and vigabatrin: 100  $\text{mmol l}^{-1}$ ; DEAB: 25  $\text{mmol l}^{-1}$ ) of each inhibitor were prepared under anoxic conditions and stored at  $-80^{\circ}\text{C}$ . These stocks were diluted daily within the anoxic chamber to make fresh embryo medium, which was changed daily. Embryos were monitored daily for survival until 100% mortality was reached. A separate plate of embryos was used for metabolite sampling

purposes and embryos were sampled at 0, 7, 14 and 30 days ( $N=3$ ). Each replicate contained five embryos.

### Metabolite extraction

Metabolites were extracted from whole embryos following previously detailed protocols (Podrabsky and Hand, 1999) and briefly described here. Samples were removed from  $-80^{\circ}\text{C}$  and immediately homogenized (1:7 w/v) in ice-cold 1  $\text{mol l}^{-1}$  perchloric acid containing 5  $\text{mmol l}^{-1}$  EDTA. Samples were then subjected to centrifugation at 16,000  $g$  for 15 min at  $4^{\circ}\text{C}$  to pellet macromolecules and other insoluble cellular components. Supernatants were removed and neutralized with a 9% volume of ice-cold 5  $\text{mol l}^{-1}$  K<sub>2</sub>CO<sub>3</sub> and perchlorate precipitates were removed by centrifugation at 16,000  $g$  for 30 min at  $4^{\circ}\text{C}$ . Supernatants were then transferred to new tubes and frozen at  $-80^{\circ}\text{C}$  until GABA and lactate determinations were performed.

### GABA determination

GABA levels were enzymatically measured using a spectrophotometric assay that was modified from previously established protocols using a 96-well plate format (Ippolito and Piwnica-Worms, 2014; Tsukatani et al., 2005). Samples (10  $\mu\text{l}$ ) were added to wells of a black clear bottom 96-well plate (Corning 3603, 07-200-565, Fisher Scientific, Hampton, NH, USA), followed by addition of 90  $\mu\text{l}$  of a freshly prepared reaction mix containing: 0.1  $\text{mol l}^{-1}$  Tris-HCl (pH 8.8), 10  $\text{mmol l}^{-1}$  dithiothreitol (DTT), 1.4  $\text{mmol l}^{-1}$  NADP, 2.0  $\text{mmol l}^{-1}$   $\alpha$ -ketoglutarate, and 0.126 U  $\text{ml}^{-1}$  GABase (G7509, Sigma-Aldrich). Change in absorbance ( $A$ ) was recorded every 60 s for 90 min at 340 nm ( $A_{340}$ ) to monitor NADPH production (Infinite M200Pro, Tecan, Männedorf, Switzerland). Because any endogenous succinic semialdehyde (SSAL) found in the sample would give false GABA levels, an inhibitor of GABA-T, 2-aminoethyl hydrogen sulfate (2-AEHS) (TCS0445, VWR, Radnor, PA, USA), was used to account for any signal resulting from endogenous SSAL being converted to GABA in the assay. An inhibitor reaction mix was created containing 50  $\text{mmol l}^{-1}$  2-AEHS. The reaction mix was allowed to incubate for 10 min following addition of GABase but before addition of the sample to ensure sufficient time for GABA-T inhibition. The final concentration of GABA was determined by subtracting the amount of GABA measured in the presence of inhibitor from the total quantity of GABA detected in the assay. Both GABA and SSAL standards were used to calculate concentrations using a standard curve. A standard curve was generated for each assay and  $A_{340}$  increased in a linear fashion with increasing GABA concentrations ( $R^2=0.99\pm 0.001$ ,  $N=41$  assays). SSAL concentrations were generally low in the samples and never represented more than 5% of the total GABA measured.

### Lactate determination

Lactate levels were enzymatically measured following a previously detailed protocol, but were modified for use in a 96-well plate format (Gleeson, 1985). Each well contained the following: 218  $\mu\text{l}$  of glycine (0.6  $\text{mol l}^{-1}$ )-hydrazine (0.5  $\text{mol l}^{-1}$ ) buffer (pH 9.2), 25  $\mu\text{l}$  27  $\text{mmol l}^{-1}$  NAD<sup>+</sup>, 5  $\mu\text{l}$  of lactate standard or sample, and 2.5  $\mu\text{l}$  14 U  $\text{ml}^{-1}$  lactate dehydrogenase (LDH; L2625, Sigma-Aldrich). The addition of LDH catalysed the oxidation of lactate to pyruvate and the associated production of NADH was monitored spectrophotometrically at  $A_{340}$  for 60 min (Infinite M200Pro, Tecan). The final concentration of lactate was determined by interpolating sample  $A_{340}$  to the lactate standard curve ( $R^2=0.99\pm 0.0004$ ,  $N=25$  assays).

### Glutamate decarboxylase activity

GAD activity was measured following a previously detailed protocol with modifications (Wolf and Klemisch, 1991). Whole embryos in groups of 13 ( $N=4$ ) from four developmental stages (DII, WS 36, WS 40 and WS 42) were removed from  $-80^{\circ}\text{C}$  and immediately mechanically homogenized with a Teflon pestle (1:3 w/v) in ice-cold  $10\text{ mmol l}^{-1}$  potassium phosphate buffer (pH 7.0) containing  $1\text{ mmol l}^{-1}$  2-(2-aminoethyl)isothiourea dihydrobromide (AET), 0.1% Triton X-100 and  $250\text{ }\mu\text{mol l}^{-1}$  pyridoxal 5'-phosphate (PLP). Samples were then sonicated on ice at 25% amplitude for 15 s to disrupt cells (Branson Digital Sonifier, S-450D, 1/8-inch SF150 microtip probe). Samples were then subjected to centrifugation at  $5000\text{ g}$  for 30 min at  $4^{\circ}\text{C}$ . Supernatants containing GAD were removed and frozen at  $-80^{\circ}\text{C}$  until the enzyme assay could be run. Preliminary experiments showed no difference in GAD activity between fresh and previously frozen samples. Samples were removed from  $-80^{\circ}\text{C}$  and allowed to thaw at room temperature for 5 min and then placed on ice for 10 min. Samples were then subjected to centrifugation at  $5000\text{ g}$  for 30 min at  $4^{\circ}\text{C}$  prior to measuring activity. Supernatants were removed and  $10\text{ }\mu\text{l}$  were mixed with  $10\text{ }\mu\text{l}$  of GAD-substrate solution ( $0.1\text{ mol l}^{-1}$  potassium phosphate buffer, pH 8.0, containing  $50\text{ mmol l}^{-1}$  glutamate,  $250\text{ }\mu\text{mol l}^{-1}$  PLP and 0.4% 2-mercaptoethanol). Samples were incubated at  $25^{\circ}\text{C}$  without light for 0, 6, 12 and 24 h. Samples ( $N=4$ ) containing  $10\text{ }\mu\text{l}$  water and  $10\text{ }\mu\text{l}$  GAD-substrate solution were used as negative controls. Reactions were terminated by addition of  $10\text{ }\mu\text{l}$   $0.25\text{ mol l}^{-1}$  HCl and then placed on ice for 5 min. Samples were then frozen at  $-80^{\circ}\text{C}$  until GABA concentrations were determined as described above. To determine the efficacy of our assay in measuring GAD activity, we measured activity in adult *A. limnaeus* brains that were dissected from two males and pooled together. Brain samples ( $N=1$ ) were subjected to the same sample preparation as embryos. Following the addition of GAD-substrate solutions (pH 6.0, 7.0, 8.0 or 9.0), samples were incubated at  $25^{\circ}\text{C}$  without light for 0, 0.75, 1.5 and 3 h and GABA accumulation was measured as described above.

### RNA sequencing data and identification

Gene transcripts associated with GABA production, signaling, degradation, transport and binding, as well as polyamine metabolism, lactate production and transport, and ethanol production were identified from the *A. limnaeus* genome annotation version 100 in the NCBI GenBank database (Wagner et al., 2018). Transcript expression data were obtained from datasets deposited in GenBank (Bioproject PRJNA272154). Data for early embryos developing at  $20^{\circ}\text{C}$  that will enter into DII ( $N=3$ ) are from Romney et al. (2018). Data for DII and post-DII embryos are from embryos incubated at

$25^{\circ}\text{C}$  and exposed to short-term anoxia. The data were collected as outlined previously (Riggs and Podrabsky, 2017). Briefly, DII, WS 36 and WS 40 embryos were sampled after 4 and 24 h of anoxia and after 2 and 24 h of aerobic recovery ( $N=4$  for DII and WS 36;  $N=6$  for WS 40). WS 42 embryos were sampled at 2 and 6 h of anoxia followed by 2 and 24 h of aerobic recovery ( $N=4$ ). RNA sequencing libraries were constructed using the Illumina TruSeq RNA Sample Preparation Kit (v2; Illumina, San Diego, CA, USA) following the manufacturer's instructions. Libraries were sequenced (100 bp paired-end reads) on a HiSeq 2000 (Illumina) instrument as outlined in Romney and Podrabsky (2017). Some of these data have been previously published (Wagner et al., 2018).

### Statistical analysis

Graphical and statistical analyses were performed using Prism 8.0 software (GraphPad, La Jolla, CA, USA) and SPSS software (version 26.0; IBM, Armonk, NY, USA).  $LT_{50}$  of embryos exposed to inhibitors in anoxia were calculated by probit regression analysis (Chapman et al., 1995) using SPSS software. Where appropriate, analysis of variance (ANOVA), analysis of covariance (ANCOVA), unpaired *t*-test, correlation analysis, linear regression, segmental linear regression or exponential one-phase decay non-linear regression were used. Non-linear and segmental linear regressions reported only include coefficient of determination ( $R^2$ ) values, as probability ( $P$ ) values cannot be calculated. To support whether slopes calculated are significantly non-zero, linear regressions were initially performed and were significant ( $P<0.05$ ). Tukey's honestly significant difference (HSD) test and Dunnett's test were used for *post hoc* comparisons, where applicable. Statistical significance was set to  $P<0.05$  for all comparisons.

## RESULTS

### Long-term anoxia exposure and recovery

#### Lactate

All developmental stages of *A. limnaeus* responded to anoxia by accumulating significant amounts of lactate (Fig. 1B; one-way ANOVA,  $P<0.0001$ ). To account for clear differences in initial and final rates of production, segmental linear regressions were performed for each developmental stage (Fig. 1B; Table 1). Initial rates were higher than final rates for each stage of embryo (Table 1). Rates were lowest in DII and increased with further post-DII development (one-way ANOVA with Tukey's HSD,  $P<0.01$ ). WS 36 embryos accumulated the highest amount of lactate during anoxia (Fig. 1B;  $23.6\pm 1.09\text{ mmol kg}^{-1}$  embryo; mean $\pm$ s.e.m.,  $N=4$ ), followed by WS 40 embryos ( $18.7\pm 3.07\text{ mmol kg}^{-1}$

**Table 1. Segmental linear regression analysis of GABA and lactate accumulation during exposure to anoxia**

|         | Parameter                                                             | WS 32/33 (DII) | WS 36 | WS 40 | WS 42 |
|---------|-----------------------------------------------------------------------|----------------|-------|-------|-------|
| GABA    | Initial* ( $\text{mmol kg}^{-1}\text{ embryo}^{-1}\text{ day}^{-1}$ ) | 0.126          | 0.281 | 0.561 | ‡     |
|         | $X_0$ (days)                                                          | 16             | 18    | 2     | ‡     |
|         | Final* ( $\text{mmol kg}^{-1}\text{ embryo}^{-1}\text{ day}^{-1}$ )   | 0.035          | 0.156 | 0.733 | ‡     |
|         | Degrees of freedom                                                    | 16             | 16    | 13    | ‡     |
|         | $R^2$                                                                 | 0.97           | 0.97  | 0.96  | ‡     |
| Lactate | Initial* ( $\text{mmol kg}^{-1}\text{ embryo}^{-1}\text{ day}^{-1}$ ) | 0.152          | 0.497 | 3.679 | 26.83 |
|         | $X_0$ (days)                                                          | 16             | 18    | 2     | 0.17  |
|         | Final* ( $\text{mmol kg}^{-1}\text{ embryo}^{-1}\text{ day}^{-1}$ )   | 0.090          | 0.253 | 2.088 | 3.322 |
|         | Degrees of freedom                                                    | 16             | 16    | 13    | 9     |
|         | $R^2$                                                                 | 0.80           | 0.97  | 0.95  | 0.96  |

$X_0$  is the time point ( $LT_{50}/4$ ) in days where the two line segments (initial and final rates of accumulation) intersect. \*Initial and final rates of accumulation were calculated from data presented in Fig. 1B. ‡GABA was barely detectable in WS 42 embryos and did not accumulate significantly (regression analysis,  $m=0.124$ ,  $R^2=0.134$ ,  $P=0.242$ ).

embryo). However, WS 40 embryos accumulated lactate at a rate seven times faster than WS 36 embryos (Table 1). We observed a significant correlation between initial rates of lactate accumulation and  $LT_{50}$  in anoxia (Fig. 2A). The relationship between initial rates of lactate accumulation and  $LT_{50}$  in anoxia reported here in DII and post-DII embryos is similar to those from previous experiments on pre-DII and DII embryos (Fig. 2A; ANCOVA,  $P=0.1886$ ) (Podrabsky et al., 2007). For those embryos that recover from anoxia, lactate slowly returned to initial levels after several days to a week (DII, WS 36 and WS 42; Dunnett's *post hoc* test,  $P<0.05$ ).

## GABA

There was significant accumulation of GABA in DII, WS 36 and WS 40 embryos, while WS 42 embryos showed no significant accumulation (Fig. 1B; one-way ANOVA,  $P<0.0001$  for DII, WS 36 and WS 40;  $P=0.2286$  for WS 42). There were clear initial and final rates of GABA accumulation in DII, WS 36 and WS 40 embryos, so segmental linear regressions were performed (Fig. 1B; Table 1). Regression analysis of data for WS 42 embryos confirmed a slope that was not statistically different from zero (Table 1). Initial rates of GABA accumulation were higher than final rates in DII and WS 36 embryos (Table 1). In contrast, final rates were higher than

initial rates in WS 40 embryos (unpaired *t*-test,  $P<0.05$ ). Rate of GABA accumulation was lowest in DII embryos and increased with post-DII development in WS 36 and WS 40 embryos. There was no relationship found between rates of initial or final GABA accumulation and  $LT_{50}$  in anoxia (Fig. 2B; correlation analysis, initial:  $r=0.10$ ,  $P=0.8951$ ; final:  $r=-0.34$ ,  $P=0.6561$ ). An inverse relationship was found in the ratio of lactate to GABA accumulated at the  $LT_{50}$  when compared with the  $LT_{50}$  of each stage (Fig. 2C). During aerobic recovery from anoxia, GABA slowly returned to initial levels in DII and WS 40 embryos (Dunnett's *post hoc* test,  $P<0.05$ ).

## Toxicity of pharmacological inhibitors in normoxia

In normoxia, WS 36 embryos incubated in GAD inhibitor EKP ( $400 \mu\text{mol l}^{-1}$ ), GABA-T inhibitor vigabatrin and SSADH inhibitor DEAB survived, developed normally, and had developmental rates that were indistinguishable from those of control embryos (data not shown). In contrast, embryos exposed to  $800 \mu\text{mol l}^{-1}$  EKP showed mortality following 5 days of exposure (Fig. S1). However, it should be noted that embryos continue developing in normoxia, which is not the case during exposure to anoxia. Additionally, embryos survived in anoxia at WS 36 significantly longer than

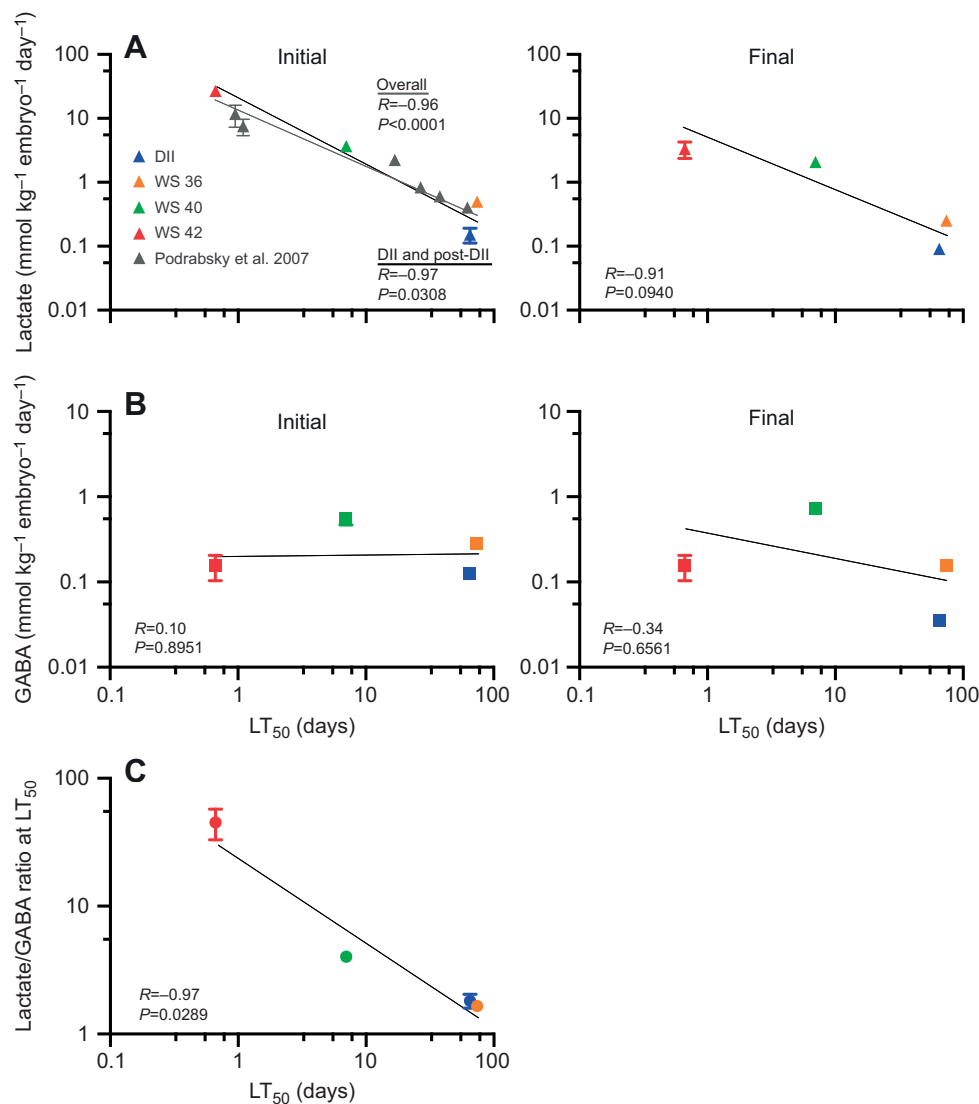

**Fig. 2. The relationship between lethal time to 50% mortality and anoxic GABA and lactate accumulation in embryos of *A. limnaeus*.** (A)  $LT_{50}$  was highly correlated with initial rates of lactate accumulation in anoxia in embryos of *A. limnaeus* (correlation analysis,  $P<0.05$ ). When initial rates of lactate accumulation of early developing embryos from Podrabsky et al. (2007) are included, the relationship was strengthened (correlation analysis,  $P<0.0001$ ). Slopes from Podrabsky et al. (2007) and data presented here are similar (ANCOVA,  $P=0.1886$ ). Final rates of lactate accumulation were not significantly correlated with survival (correlation analysis,  $P=0.0940$ ). Each replicate consists of five embryos. Symbols represent means  $\pm$  s.e.m. ( $N=4$  for DII, WS 36 and WS 40;  $N=3$  for WS 42). Error bars for certain stages are within the symbol. (B) There was no correlation found between  $LT_{50}$  and rates of GABA accumulation (correlation analysis,  $P>0.05$ ). (C) There was a negative relationship between  $LT_{50}$  and the ratio of lactate to GABA accumulated during anoxia (correlation analysis,  $P<0.05$ ). Values were determined by dividing the total lactate by total GABA accumulated at each stage's respective  $LT_{50}$  for each biological replicate. Note that the x- and y-axes are on a log scale for all panels.

developing embryos exposed to  $800 \mu\text{mol l}^{-1}$  EKP in normoxia (Fig. S1). Exposure to  $800 \mu\text{mol l}^{-1}$  EKP starting at WS 40 led to mortality after 2 days (Fig. S1). These data are interpreted to indicate stage-specific toxicity of EKP in WS 39 and later embryos, and probably illustrate a necessity for GABA in late development.

### Inhibition of GABA synthesis and degradation in anoxia Ethyl ketopentenoate

EKP, a potent inhibitor of GAD, exhibited dosage-dependent reductions in GABA production during anoxia in WS 36 embryos

(Fig. 3B,C). GABA levels were significantly lower after 14 days in  $400 \mu\text{mol l}^{-1}$  treated embryos when compared with controls, while levels were significantly lower after only 7 days in  $800 \mu\text{mol l}^{-1}$  treatments (Fig. 3B,C; two-way ANOVA with Tukey's HSD,  $P < 0.05$ ). Embryos exposed to  $400 \mu\text{mol l}^{-1}$  EKP produced GABA at a rate 42% slower than control embryos, whereas embryos exposed to  $800 \mu\text{mol l}^{-1}$  EKP produced GABA at a rate 52% slower than controls. Interestingly, exposure to either concentration of EKP led to no changes in rates of lactate accumulation (Fig. 3D,E; two-way ANOVA with Tukey's HSD,  $P > 0.05$ ; ANCOVA,  $P > 0.05$ ).

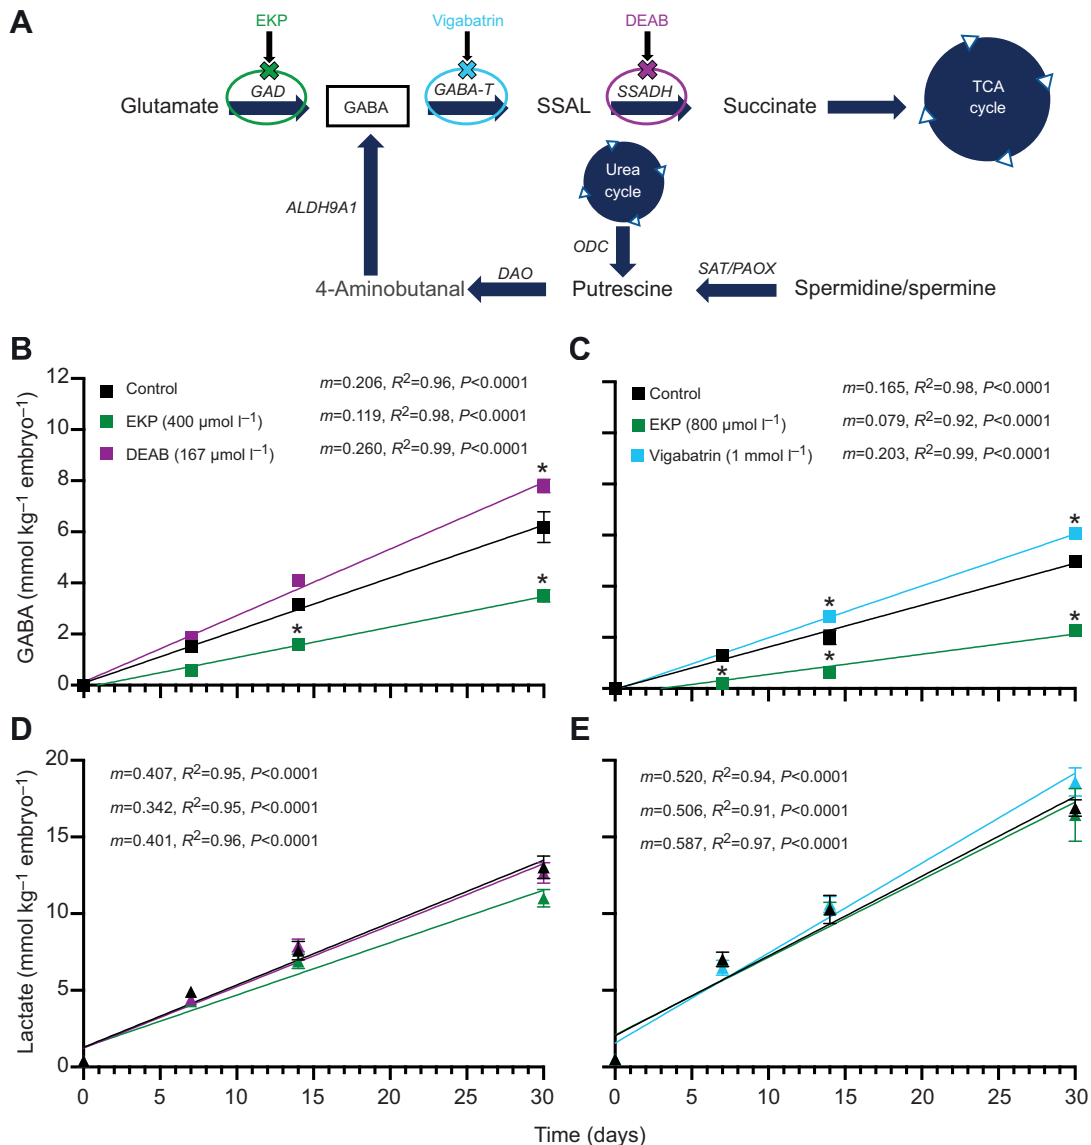

**Fig. 3. GABA and lactate accumulation during inhibition of the GABA synthesis and degradation pathway in Wourms' stage 36 embryos exposed to anoxia.** (A) Schematic depicting canonical and non-canonical synthesis and metabolic degradation of GABA and the key enzymes pharmacologically inhibited in experiments. GAD, glutamate decarboxylase; GABA-T, GABA transaminase; SSAL, succinic semialdehyde; SSADH, succinic acid semialdehyde dehydrogenase; EKP, ethyl ketopentenoate; DEAB, *N,N*-diethylaminobenzaldehyde; ALDH9A1, aldehyde dehydrogenase; DAO, diamine oxidase; ODC, ornithine decarboxylase; SAT, spermidine/spermine N1-acetyltransferase; PAOX, polyamine oxidase. (B,C) GABA accumulated in a linear manner for the control, EKP, DEAB and vigabatrin treatments (regression analysis,  $P < 0.0001$ ). Rates of GABA accumulation ( $m$ ) for all treatments and the controls were significantly different from one another (B: ANCOVA,  $F=55.96, P < 0.0001$ ; C: ANCOVA,  $F=74.54, P < 0.0001$ ). \*Treatment time points that were significantly different from the control (two-way ANOVA with Tukey's HSD,  $P < 0.05$ ). Symbols represent means  $\pm$  s.e.m. ( $N=3$ ) and each replicate contained five embryos. (D,E) Lactate accumulated in a linear manner for the control, EKP, DEAB and vigabatrin treatments (regression analysis,  $P < 0.0001$ ). Rates of lactate accumulation ( $m$ ) were similar for the controls and all treatments (D: ANCOVA,  $F=1.750, P=0.19$ ; E: ANCOVA,  $F=1.043, P=0.36$ ). No time points for embryos treated with EKP, DEAB or vigabatrin were significantly different from one another or the control (two-way ANOVA with Tukey's HSD,  $P > 0.05$ ).



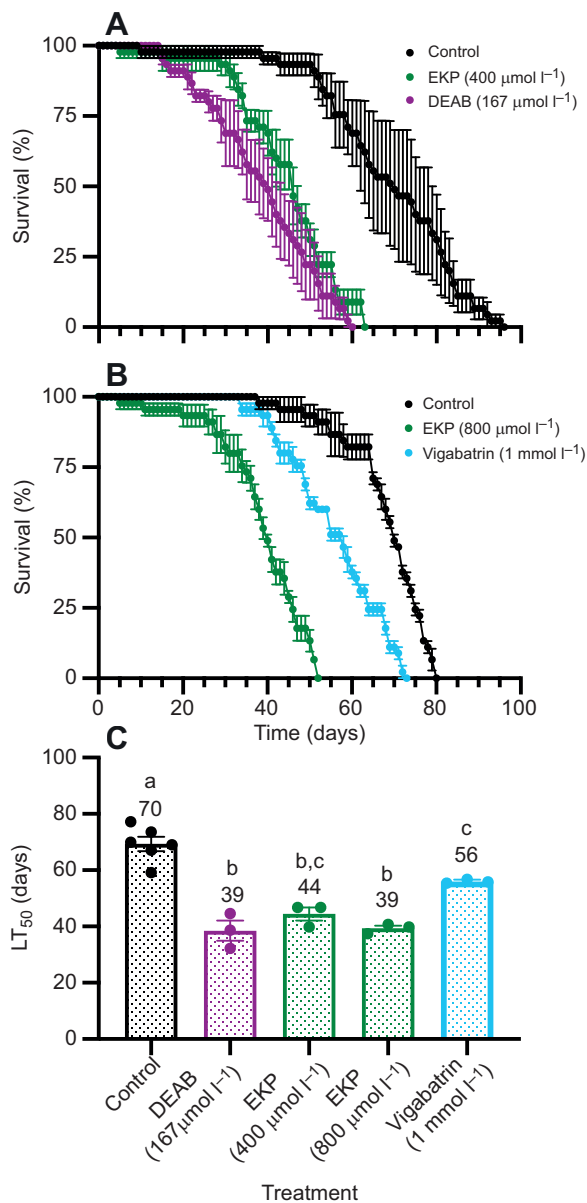

**Fig. 4. Survival of Wourms' stage 36 embryos continuously exposed to GAD inhibitor EKP, SSADH inhibitor DEAB and GABA-T inhibitor vigabatrin in anoxia.** Groups of 15 embryos were exposed to embryo medium containing (A) 400  $\mu\text{mol l}^{-1}$  EKP or 167  $\mu\text{mol l}^{-1}$  DEAB, and (B) 800  $\mu\text{mol l}^{-1}$  EKP or 1 mmol  $\text{l}^{-1}$  vigabatrin in anoxia at 25°C. Symbols are means  $\pm$  s.e.m. ( $N=3$ ). (C) Lethal time to 50% mortality ( $\text{LT}_{50}$ ) for embryos exposed to anoxia. Different lower case letters indicate significant differences in  $\text{LT}_{50}$  between treatments (one-way ANOVA with Tukey's HSD test,  $P<0.05$ ). Bars denote means  $\pm$  s.e.m. (control,  $N=6$ ; inhibitors,  $N=3$ ) and symbols represent individual replicates. GAD, glutamate decarboxylase; EKP, ethyl ketopentenoate; SSADH, succinic acid semialdehyde dehydrogenase; DEAB, *N,N*-diethylaminobenzaldehyde; GABA-T, GABA transaminase.

However, exposure to both dosages of EKP led to decreased survival in anoxia (Fig. 4A,B). When the survival data were used to calculate  $\text{LT}_{50}$  values, embryos exhibited a 37 and 44% reduction in survival compared with controls, with  $\text{LT}_{50}$  values of  $44 \pm 4$  and  $39 \pm 2$  days (mean  $\pm$  s.e.m.,  $N=3$ ) in anoxia for 400 and 800  $\mu\text{mol l}^{-1}$  treatments, respectively (Fig. 4C). Despite having similar mean  $\text{LT}_{50}$  values (one-way ANOVA,  $P=0.78$ ), 800  $\mu\text{mol l}^{-1}$  treated embryos did not survive as long as 400  $\mu\text{mol l}^{-1}$  treated embryos (Fig. 4B,C). Embryos treated with 400  $\mu\text{mol l}^{-1}$  reached 100%

mortality after 62 days, while it only took 51 days for 800  $\mu\text{mol l}^{-1}$  treated embryos.

### Vigabatrin

Vigabatrin, an inhibitor of GABA-T, increased GABA levels in WS 36 embryos exposed to anoxia after 14 d compared to control embryos (Fig. 3C; two-way ANOVA with Tukey's HSD,  $P<0.05$ ). GABA accumulated at a rate 23% faster than controls. Lactate accumulation was not affected by vigabatrin (Fig. 3E; two-way ANOVA with Tukey's HSD,  $P>0.05$ ; ANCOVA,  $P>0.05$ ). Vigabatrin decreased survival of anoxic embryos by 20% ( $\text{LT}_{50}=56 \pm 0.5$  d; mean  $\pm$  s.e.m.,  $N=3$ ; Fig. 4B,C).

### *N,N*-diethylaminobenzaldehyde

DEAB, an inhibitor of SSADH, increased GABA levels in WS 36 embryos exposed to anoxia after 30 days compared with control embryos (Fig. 3B; two-way ANOVA with Tukey's HSD,  $P<0.05$ ). GABA accumulated at a rate 26% faster than controls. DEAB had no effect on rates of lactate accumulation (Fig. 3D; two-way ANOVA with Tukey's HSD,  $P>0.05$ ; ANCOVA,  $P>0.05$ ). DEAB decreased survival of anoxic embryos (Fig. 4B), leading to a 44% reduction in  $\text{LT}_{50}$  ( $39 \pm 4$  days; mean  $\pm$  s.e.m.,  $N=3$ ; Fig. 4C).

### GAD activity during development

Significant rates of GABA synthesis were observed in homogenates of adult brain tissue incubated at pH 7–9, confirming the utility of this assay for estimating GAD activity in homogenates of *A. limnaeus* (Fig. S2; regression analysis,  $P<0.005$ ). We observed low, but significantly greater than zero, rates of GAD activity in post-DII embryo homogenates (Fig. 5A). No significant GAD activity was detected in DII embryos after 24 h of incubation (Fig. 5A). Despite the low observed GAD activity, this capacity for GABA production is sufficient to account for the GABA produced in whole embryos during anoxia. Observed GAD activity provides reasonable prediction of initial GABA accumulation during anoxia ( $\text{LT}_{50}/4$ ) for DII and WS 36 embryos (Table 2; unpaired *t*-test,  $P>0.05$ ). In contrast, the capacity for GABA production by GAD is significantly greater than needed in WS 40 and WS 42 embryos (unpaired *t*-test,  $P<0.05$ ). Despite observing the highest enzymatic capacity for GAD activity, WS 42 embryos did not produce significant levels of GABA during anoxia (Fig. 1B). There is a significant negative relationship between  $\text{LT}_{50}$  and GAD activity (Fig. 5B).

### RNA sequencing

#### GABA pathway

Early developing embryos had generally higher levels of transcripts involved in GABA synthesis and degradation, which tended to decrease and level off as they approached DII (Fig. 6A). DII embryos observed relatively constant expression of these transcripts during anoxia and recovery. Interestingly GAD2 expression was highest in DII, whereas it was absent or low in expression in all other stages. WS 36 embryos exhibited highest expression of GAD1 in post-DII embryos, which increased with short-term anoxia exposure and decreased with aerobic recovery. Transcripts for GABA-T decreased with anoxia and recovery, but were still expressed [ $>1000$  fragments per kilobase per million mapped reads (FPKM)]. SSADH transcript levels were maintained during anoxia and recovery in DII and post-DII stages. WS 40 embryos have relatively high GAD1 and GABA-T expression. The overall expression pattern for GABA synthesis and degradation in WS 42 embryos was relatively high and constant during anoxia, despite not producing GABA. However, expression of GAD transcripts



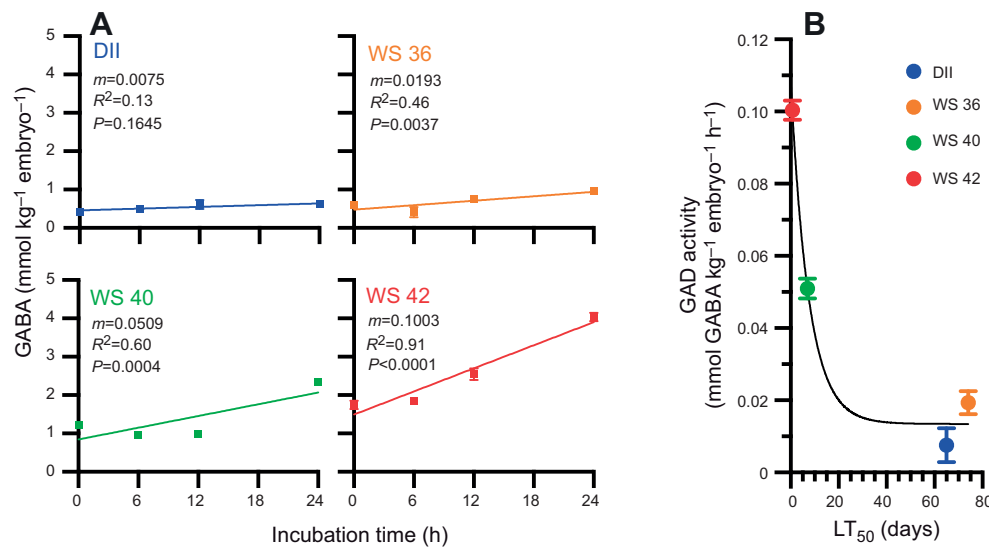

**Fig. 5. GAD activity in *A. limnaeus* embryo homogenates across development in normoxia at 25°C.** (A) Post-DII embryo homogenates generate GABA at low rates that are significantly greater than 0 (regression analysis,  $P < 0.01$ ) while DII embryo homogenates did not show a significant accumulation of GABA after 24 h of incubation (regression analysis,  $P = 0.1701$ ). Rates of GABA production and thus GAD activity were based on the slope ( $m$ ) of GABA accumulation over time. Symbols are means  $\pm$  s.e.m. ( $N = 4$ ). Each replicate consisted of 13 embryos. (B) There is a negative relationship between  $LT_{50}$  and GAD activity in embryos of *A. limnaeus*. Exponential one-phase decay analysis provides a good fit for the two variables ( $R^2 = 0.96$ ). Symbols represent means  $\pm$  s.e.m. ( $N = 4$ ).

increased during aerobic recovery. GAD enzyme activity (Fig. 5B) is inversely related to transcript expression patterns for GAD enzymes in post-DII embryos.

#### Polyamine metabolism

A number of transcripts involved in polyamine metabolism were abundant in all embryonic stages (Fig. 6B). The most abundant transcripts (*SAT1*, *ODC1* and *ALDH9A1*) remained high throughout development. A transcript that encodes a diamine oxidase (*AOC2*) was highest in WS 20 embryos and decreased with development towards DII, where it then increased in abundance and remained high during DII and post-DII development.

#### Lactate and ethanol pathways

Transcripts for lactate dehydrogenases (LDH) were abundant in all stages of embryos (Fig. 6C). LDH B was the primary isoform expressed in early embryos, while both the A and B isoforms were expressed in DII. For post-DII embryos, LDH B was the primary transcript expressed with LDH A appearing in WS 36 embryos during recovery from anoxia. Transcripts for proteins involved in ethanol production were low in DII and post-DII embryos, with the most abundant transcripts (*PDHB*, *PDK2A*, *DLD* and *ADH3*; Fig. 6C) showing similar expression patterns in all stages, with the exception of an *ADH1*-like transcript being highly expressed in WS 40 embryos.

**Table 2. Predicted initial GABA accumulation based on GAD activity compared with observed GABA accumulated in embryos exposed to anoxia (from Fig. 1B)**

|                | $LT_{50}/4$ (mmol kg <sup>-1</sup> embryo <sup>-1</sup> ) |                   |            |
|----------------|-----------------------------------------------------------|-------------------|------------|
|                | Predicted                                                 | Observed          | Difference |
| WS 32/33 (DII) | 2.88                                                      | 2.42              | 0.46       |
| WS36           | 8.34                                                      | 5.18              | 3.16       |
| WS40           | 2.44 <sup>a</sup>                                         | 0.85 <sup>b</sup> | 1.59       |
| WS42           | 0.40 <sup>a</sup>                                         | 0.17 <sup>b</sup> | 0.23       |

Despite not accumulating significant amounts of GABA during anoxia, observed mean GABA levels are included for WS 42 embryos. Different lower case letters indicate significant differences in predicted and observed values within developmental stage (unpaired  $t$ -test,  $P < 0.05$ ).

#### GABA and lactate transporters

GABA transporters (GAT) were absent or expressed in low levels during early development (Fig. 6D). In contrast, transcripts for GAT1 and GAT3 paralogs were highly expressed in DII embryos. These same transcripts were induced during anoxia and aerobic recovery in WS 36 embryos. WS 40 embryos uniquely only expressed GAT2 paralogs, whereas WS 42 embryo expression patterns were similar to DII embryos, but at lower levels. An abundance of monocarboxylate transporters (MCTs) were expressed in embryos of *A. limnaeus* (Fig. 6D). Early developing embryos displayed the highest expression of MCTs, primarily expressing MCT1-like and MCT7-like transcripts, which were highest in WS 20 embryos and decreased with development towards DII. Generally, DII embryos exhibited more MCT expression than post-DII embryos.

#### GABA receptors and co-transporters

The *A. limnaeus* genome contains an abundance of GABA<sub>A</sub> receptor subunit variants compared with relatively few GABA<sub>B</sub> receptor subunit variants (Fig. 7). Despite the high expression of transcripts involved in GABA synthesis and degradation, transcripts for GABA signaling were predominantly absent in early developing embryos, with the exception of a single GABA<sub>A</sub>R subunit- $\rho$ -3-like transcript. In contrast, DII embryos expressed the highest diversity of GABA receptor subunits. WS 36 embryos had relatively low amounts of expression prior to anoxia, which consistently increased during anoxia and aerobic recovery. WS 40 embryos had similar expression to early developing embryos, with most receptors being minimally expressed besides GABA<sub>A</sub>R subunit- $\rho$ -3-like. WS 42 embryos had consistent expression of several receptors that generally matched the receptors expressed in DII embryos, some of which increased during recovery from anoxia. GABA<sub>A</sub> receptor-associated proteins were highly expressed in all stages (Fig. 7). The highest expression of GABA<sub>A</sub> receptor-associated proteins was found in WS 20 embryos. Co-transporters (NKCC and KCC) were observed in all stages of embryos (Fig. 7). KCC1 expression was low early in development, but increased as embryos approached DII and remained constant during post-DII development. Interestingly, NKCC2 was highly expressed in DII embryos, but barely expressed in all other stages.

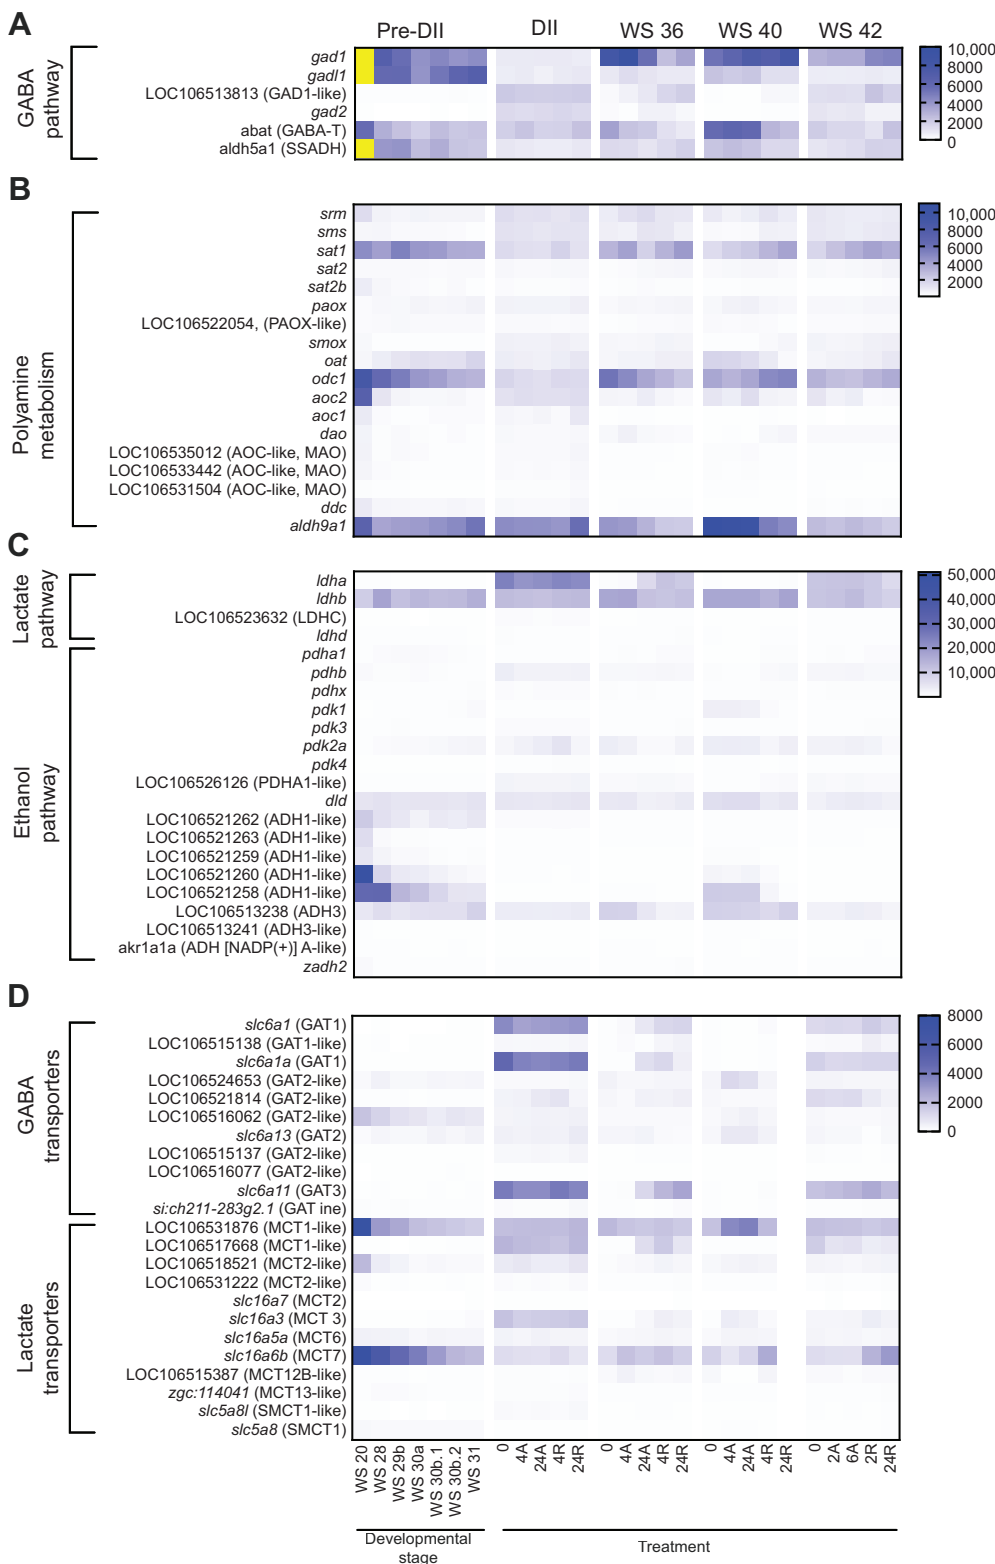

**Fig. 6. Transcript levels for GABA, polyamine, lactate and ethanol pathways in *A. limnaeus* as determined by RNA sequencing.** Enzyme systems are organized into groups: (A) GABA synthesis and degradation, (B) polyamine metabolism, (C) lactate and ethanol synthesis and (D) GABA and lactate transportation. Data for pre-DII development (WS 20–31) were obtained from embryos incubated at 20°C and were collected at the developmental stages shown at the bottom of the heatmap. Embryos in DII and post-DII were incubated at 25°C and time points for anoxia and aerobic recovery are shown below the heatmap: 0, normoxia; 4A, 4 h anoxia; 24A, 24 h anoxia; 4R, 4 h recovery; 24R, 24 h recovery; 2A, 2 h anoxia; 2R, 2 h recovery. Expression levels are reported as mean fragments per kilobase per million mapped reads (FPKM).  $N=3$  for pre-DII stages;  $N=4$  for DII, WS 36 and WS 42;  $N=6$  for WS 40. WS, Wourms' stage. Cells in yellow indicate transcript levels that were over-expressed (FPKM=11,000–30,000).

### Age of female on GABA and lactate accumulation

Sampling of embryos spanned the lifespan of *A. limnaeus* and was continued across generations. Due to differences in GABA and lactate levels observed between experiments, we explored the relationship between female age and rates of GABA and lactate accumulation in anoxic WS 36 embryos. No correlation was found between the rate of GABA accumulation and female age (Fig. S3A;

$R^2=0.07$ ,  $P=0.67$ ). Interestingly, embryos from younger females produced lactate during anoxia at a faster rate than embryos produced by older females (Fig. S3B;  $R^2=0.97$ ,  $P<0.01$ ).

### DISCUSSION

The impressive survival of anoxia by *A. limnaeus* embryos appears to rely fundamentally on the same metabolic pathways as anoxia-

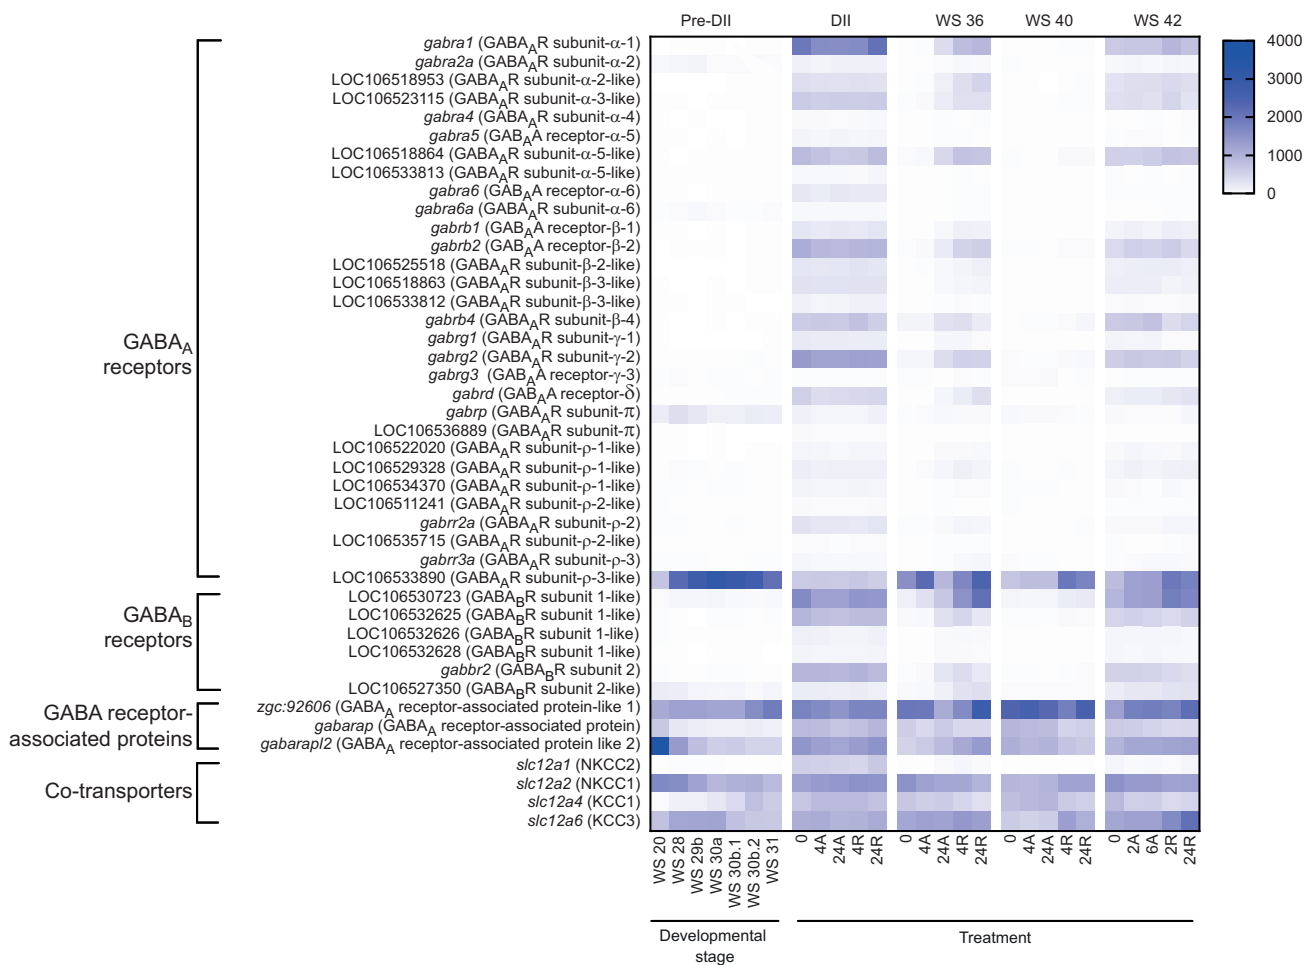

**Fig. 7. Transcript levels for GABA signaling and co-transporters in *A. limnaeus* as determined by RNA sequencing.** Enzyme systems are organized into groups: GABA<sub>A</sub> receptors and subunits, GABA<sub>B</sub> receptors and subunits, GABA receptor-associated proteins, and Na<sup>+</sup>–K<sup>+</sup>–Cl<sup>–</sup> (NKCC) and K<sup>+</sup>–Cl<sup>–</sup> co-transporters (KCC). Data for pre-DII development (WS 20–31) were obtained from embryos incubated at 20°C and were collected at the developmental stages shown at the bottom of the heatmap. Embryos in DII and post-DII were incubated at 25°C and time points for anoxia and aerobic recovery are shown below the heatmap: 0, normoxia; 4A, 4 h anoxia; 24A, 24 h anoxia; 4R, 4 h recovery; 24R, 24 h recovery; 2A, 2 h anoxia; 2R, 2 h recovery. Expression levels are reported as mean fragments per kilobase per million mapped reads (FPKM). *N*=3 for pre-DII stages; *N*=4 for DII, WS 36 and WS 42; *N*=6 for WS 40. WS, Wourms' stage.

sensitive organisms with lactate as the major product of anaerobic glycolysis. Consistent with previous data for early embryos of *A. limnaeus* (Podrabsky et al., 2007) and a variety of other organisms (Hand, 1998), survival of anoxia in DII and post-DII embryos is proportional to the level of metabolic depression achieved. This point is illustrated well by the high negative correlation between rate of lactate accumulation and survival of anoxia as estimated by the LT<sub>50</sub>. Thus, the fundamental key to long-term survival of anoxia appears to be the limiting of lactate accumulation.

Lactic acidosis is a major factor contributing to cell death in low oxygen environments (Kubasiak et al., 2002). Fish embryos are a closed system, which is especially important because metabolic end-products, such as lactate, have no means of exiting the embryo. In the western painted turtle, lactic acidosis is buffered by the turtle's mineralized shell (Jackson, 1997; Jackson et al., 2000; Jackson and Heisler, 1982). The internal pH of *A. limnaeus* embryos has never been measured. Although the embryos have a high tolerance of a wide range of external pH conditions and can survive for about a month at pH 2 (Podrabsky et al., 2016), it is unclear whether embryos have high capacity to buffer the acidosis of lactate or if they are able to tolerate a low internal pH. The robust expression of several lactate transporters suggests that lactate is probably being

shuttled within the embryo. A likely destination for lactate is the yolk. Shuttling lactate into the yolk may prevent embryonic cells from experiencing severe acidosis. However, additional work is needed to explore the buffering capacity of the yolk and possible compartmentalization of metabolic pathways between the yolk and embryonic cells that may support anaerobic metabolism.

The general characterization of lactate as a poor anaerobic end-product may be unwarranted. In appropriate quantities, lactate has been seen to play important roles in regulating gene expression through epigenetic mechanisms. For example, lactate has been shown to inhibit histone deacetylase activity (HDAC), which can have genome-wide effects (Latham et al., 2012). In addition, recent evidence suggests that histones can be post-translationally modified by the addition of lactate (lactylation), which induces change in gene expression through modification of chromatin structure (Zhang et al., 2019). Lactate has also been found to play a neuroprotective role, preventing excitotoxic cell death and insults from cerebral ischemia (Berthet et al., 2009; Jourdain et al., 2016). It was recently shown that human neuroblastoma cells (SH-SY5Y) and *Caenorhabditis elegans* pre-treated with lactate promoted oxidative stress resistance and resulted in long-term stress resistance and longevity (Taufenberger et al., 2019). Thus, it is possible that

lactate is a necessary and conserved part of the vertebrate response to anoxia, and when coupled with the proper mechanisms for metabolic suppression, can be an effective means of supporting anaerobic metabolism for long-term survival.

Previous studies in crucian carp suggest that GABA may play a role in suppressing metabolism during anoxia, as indicated by a near threefold increase in ethanol (the major anaerobic end-product) production when fish were injected with isoniazid, an inhibitor of GAD (Nilsson, 1992). In *A. limnaeus*, GABA synthesis and lactate production appear to be independent, as evidenced by no change in lactate accumulation with inhibition of GAD, GABA-T or SSADH. Although it is possible that inhibition of GABA synthesis could be affecting some other major metabolic pathway such as ethanol production, it is unlikely given the rather extensive metabolomics studies performed on *A. limnaeus*, the generally low levels of transcripts for proteins in this pathway, and the fact that previous efforts have failed to detect ethanol production in embryos (Podrabsky and Hand, 1999). Thus, we conclude that GABA is not playing a general role in suppression of metabolism during anoxia in embryos of *A. limnaeus*.

Decreased survival when GABA-T and SSADH are inhibited suggests that at least part of the GABA produced during anoxia is being metabolized and shuttled into the TCA cycle. Because GABA degradation can lead to ammonia consumption, NADH oxidation and GTP production (Goldlust et al., 1995), this response could be beneficial for supporting embryonic metabolism during exposure to anoxia. The rate of lactate accumulation appears to decrease over long-term anoxia, which may indicate a shift in reliance to GABA metabolism.

Although GABA metabolism appears to be critical for long-term survival in anoxia, the innate capacity for high GAD activity does not correspond to anoxia tolerance. We hypothesized that embryos from anoxia-tolerant stages would have higher basal GAD enzymatic activity than anoxia-sensitive stages. However, we saw an inverse relationship between normoxic GAD activity and anoxia tolerance. Despite having the highest capacity to make GABA, WS 42 embryos produced negligible GABA in anoxia. This is contrary to what is seen with LDH capacity in *A. limnaeus* embryos, where there is an increase in LDH capacity with post-DII development that translates to high LDH activity during anoxia (Chennault and Podrabsky, 2010).

Anoxia-induced GABA synthesis is not unique to *A. limnaeus* embryos (Nilsson and Lutz, 2004; Nilsson et al., 1991; Podrabsky et al., 2007). Despite previous knowledge of GABA accumulation in anoxia, this is the first study to directly relate GABA metabolism to survival of *A. limnaeus* embryos in anoxia. We found that inhibition of enzymes responsible for both GABA synthesis (via GAD) and degradation (via GABA-T and SSADH) led to decreased survival (20–44% reduced  $LT_{50}$  values) in the most anoxia-tolerant developmental stage (WS 36). Inhibition of enzymes that degrade GABA (GABA-T and SSADH) lead to increased accumulation of GABA and decreased survival; thus, increased concentrations of GABA do not necessarily translate to longer survival. These data suggest a role for GABA as a metabolic intermediate supporting anaerobic metabolism, and not a simple end-product. Interestingly, the effects of decreased GABA production on survival are not obvious until after 3–4 weeks of anoxia, suggesting a role in long-term rather than short-term survival. Furthermore, doubling the dose of EKP to block GABA production had only a marginal effect on the  $LT_{50}$ , but resulted in a much more rapid time to 100% mortality. Thus, we conclude that GABA synthesis plays a critical role in long-term anoxia tolerance as a metabolic intermediate of critical importance.

The abundance and diversity of GABA transporter transcripts expressed in *A. limnaeus* embryos suggest that GABA may be shuttled within the embryo or within cells after production. It is important to note that this would only be the case if the proteome matches the transcript data. The expression of high levels of GABA transporter transcripts in DII embryos and anoxia-induced elevation in transcripts of GABA transporters in WS 36 embryos suggests an importance for GABA shuttling during anoxia. Several GABA transporters remain high or continue to increase during aerobic recovery in DII and WS 36 embryos. One possibility is that GABA is being transported into the yolk. Alternatively, GABA may be synthesized in the yolk and transported to the developing embryo. This is consistent with a lack of GABA production in two established anoxia-tolerant cell lines of *A. limnaeus* (PSU-AL-WS40NE and WS36-2 cells; authors' unpublished data). Another possibility is that only specific cells within the embryo produce GABA, and the two neural-derived cell lines isolated are not responsible for GABA production. Nevertheless, preliminary evidence suggests that GABA is present in both the yolk and cellular fractions of embryos (unpublished). The internal pH of embryos and the localization of lactate and GABA during anoxia and recovery from anoxia are currently unknown and need to be resolved to fully understand the physiology of GABA production in this species.

The main function of GABA in adult vertebrates is as a neurotransmitter. The diversity of GABA receptor subunits expressed in *A. limnaeus* embryos support the potential for GABA as an early neurotransmitter in this species. GABA has been found to provide excitatory actions in the developing vertebrate nervous system, but conversely, typically functions as an inhibitory neurotransmitter in adults (Ben-Ari, 2002). The switch from excitatory to inhibitory transmission occurs due to delayed expression of  $K^+$ - $Cl^-$ -coupled co-transporters (KCC). If the transcript data reflect the proteome, then these data support GABA acting as an inhibitory transmitter during *A. limnaeus* development due to the rise in KCC transcripts as embryos develop to DII and beyond. This may represent a unique developmental adaptation to anoxia tolerance in *A. limnaeus*.

Increased GABA levels are thought to protect the brain of many organisms from excitotoxic cell death during hypoxic and anoxic conditions (Lutz and Milton, 2004; Lutz and Nilsson, 2004; Nilsson and Lutz, 2004; Podrabsky et al., 2007). A main factor that differentiates anoxia-tolerant and anoxia-sensitive species is their ability to maintain glutamate homeostasis in response to low oxygen levels (Nilsson and Renshaw, 2004). The ability to convert an excitatory neurotransmitter (glutamate) to an inhibitor neurotransmitter (GABA) may be beneficial to embryos trying to depress their metabolism and prevent excitotoxic cell death during anoxia. Increased endogenous GABA release during anoxia dampened excitatory potentials in turtle brain (Pamenter et al., 2011), and preventing GABA re-uptake and metabolism in mammalian models supports neuroprotection during ischemia (Prentice, 2009; Schwartz-Bloom and Sah, 2001). Furthermore, turtle neurons treated with GABA<sub>A</sub> and GABA<sub>B</sub> receptor antagonists exhibited seizure-like effects and eventual cell death, similar to excitotoxic cell death in anoxic mammalian brains (Pamenter et al., 2011). Perhaps GABA is acting in a similar manner in *A. limnaeus*, thereby increasing the stimulation required to elicit an action potential. However, the accumulation of GABA in gross excess of that needed for neuroprotection in *A. limnaeus* (1000 times more than in other anoxia-tolerant species), suggests multiple or novel functions. Localization of GABA receptors and



transporters in embryos and their role in anoxia is worth further exploration. Functional tests through exposure of embryos to GABA receptor antagonists could provide insight into the neurotransmitter function of GABA in anoxia.

This is the first extensive study of long-term anoxia and aerobic recovery in *A. limnaeus*. Our findings suggest that embryos seemingly go unharmed and without developmental defect following long-term anoxia. However, recovery from anoxia appears to be slow, with lactate and GABA levels not returning to pre-anoxia levels until after at least a week of aerobic recovery. This slow reduction of both lactate and GABA may be an adaptive and protective mechanism for supporting survival of long-term anoxia. A primary cause of mortality due to anoxic exposure is not the lack of oxygen itself, but ironically the re-oxygenation event that occurs afterwards (Bundgaard et al., 2020; Saikumar et al., 1998). A rapid increase in reactive oxygen species (ROS) in response to re-initiating aerobic respiration can lead to damaging of DNA, cell membranes and proteins (Schieber and Chandel, 2014). In anoxia-sensitive mammals, re-oxygenation is associated with over-production of ROS from mitochondria, which often initiates programmed cell death (apoptosis). Although ROS has not been quantified in embryos of *A. limnaeus*, they possess a large anti-oxidant capacity that is likely to help protect against ROS production (Wagner et al., 2019). A surge in ROS production can probably be minimized by a slow increase in aerobic metabolism following recovery. The inhibitory and sedative effects of GABA on neurons may prevent a surge of synapses firing, thereby decreasing ROS production by slowly increasing aerobic metabolism. This would be consistent with observations of a slow return of a heart rate in WS 36 embryos following long-term anoxia exposure. One interesting possibility is the shunting of GABA into polyamine metabolism during transitions from anoxia to normoxia, or perhaps during severe hypoxia. GABA can be converted to putrescine through a pathway that utilizes the enzyme diamine oxidase (DAO), which consumes hydrogen peroxide and produces molecular oxygen in the process. This would be an excellent method to help prevent accumulation of ROS damage during periods of severe oxygen limitation. The expression of genes involved in this pathway would support this possible function for GABA during recovery from anoxia or during prolonged severe hypoxia, both conditions where elevated hydrogen peroxide production would be expected. Because DAO requires molecular oxygen or hydrogen peroxide to function, this pathway would be largely blocked during long-term anoxia, allowing GABA to accumulate in preparation for use during periods of re-oxygenation. In addition, this could be a mechanism for detoxification of ROS associated with episodic or brief re-introductions of oxygen. Similarly, in the yeast *Saccharomyces cerevisiae*, the GABA shunt pathway has been shown to be critical in reducing ROS production and protecting against oxidative stress (Cao et al., 2013; Coleman et al., 2001). Although not yet investigated in animals, the conserved role of GABA across bacteria, yeast, plants and animals in reduction of oxidative stress suggests this possibility in *A. limnaeus*. Perhaps GABA and lactate accumulated during anoxia aid in both surviving without oxygen and the re-oxygenation event that follows. The combination of lactate and GABA serving as neuroprotective and anti-oxidant agents is worth exploring further.

Previous studies on *A. limnaeus* embryos have shown their extreme anoxia tolerance (Meller et al., 2012; Podrabsky et al., 2007; Riggs and Podrabsky, 2017), but this is the first study to observe these metabolites in response to long-term anoxia across development and aerobic recovery. We show that GABA may have

multiple functions in *A. limnaeus* embryos that could be contributing to survival during anoxia and recovery. Most importantly, we show that GABA is being synthesized and degraded using common pathways in vertebrates. Further exploration into the metabolism, signaling and localization of GABA and lactate in *A. limnaeus* embryos will provide further insight into how anoxia-sensitive organisms can survive anoxic events and avoid ischemic injury.

#### Acknowledgements

The authors would like to thank Adalid Pelayo for assistance in metabolite extractions, Michèle Partoens and Dr Peter de Witte for providing us with EKP, and Dr Amie Romney and Dr Claire Riggs for their preparation of the RNA sequencing data included in the manuscript. In addition, we would like to thank all the undergraduate student workers who helped with animal husbandry and maintenance.

#### Competing interests

The authors declare no competing or financial interests.

#### Author contributions

Conceptualization: D.E.Z., J.E.P.; Methodology: D.E.Z., J.E.P.; Formal analysis: D.E.Z., J.E.P.; Investigation: D.E.Z., J.E.P.; Data curation: D.E.Z., J.E.P.; Writing - original draft: D.E.Z.; Writing - review & editing: D.E.Z., J.E.P.; Visualization: D.E.Z., J.E.P.; Supervision: J.E.P.; Funding acquisition: J.E.P.

#### Funding

The work was supported by a National Science Foundation grant (IOS-1354549) to J.E.P.

#### Supplementary information

Supplementary information available online at <https://jeb.biologists.org/lookup/doi/10.1242/jeb.229716.supplemental>

#### References

- Ben-Ari, Y. (2002). Excitatory actions of GABA during development: the nature of the nurture. *Nat. Rev. Neurosci.* **3**, 728-740. doi:10.1038/nrn920
- Ben-Menachem, E. (2011). Mechanism of action of vigabatrin: correcting misperceptions. *Acta Neurol. Scand.* **124**, 5-15. doi:10.1111/j.1600-0404.2011.01596.x
- Berthet, C., Lei, H., Thevenet, J., Gruetter, R., Magistretti, P. J. and Hirt, L. (2009). Neuroprotective role of lactate after cerebral ischemia. *J. Cereb. Blood Flow Metab.* **29**, 1780-1789. doi:10.1038/jcbfm.2009.97
- Boutillier, R. G. (2001). Mechanisms of cell survival in hypoxia and hypothermia. *J. Exp. Biol.* **204**, 3171-3181.
- Bundgaard, A., Ruhr, I. M., Fago, A. and Galli, G. L. (2020). Metabolic adaptations to anoxia and reoxygenation: new lessons from freshwater turtles and crucian carp. *Curr. Opin. Opin. Endocr. Metab. Res.* **11**, 55-64. doi:10.1016/j.coemr.2020.01.002
- Cao, J., Barbosa, J. M., Singh, N. K. and Locy, R. D. (2013). GABA shunt mediates thermotolerance in *Saccharomyces cerevisiae* by reducing reactive oxygen production. *Yeast* **30**, 129-144. doi:10.1002/yea.2948
- Chapman, G. A., Denton, D. L. and Lazorchak, J. M. (1995). *Short-Term Methods for Estimating the Chronic Toxicity of Effluents and Receiving Waters to West Coast Marine and Estuarine Organisms*, Vol. 1, pp. 1-673. Cincinnati, OH: National Service Center for Environmental Publications. doi:10.1242/jeb.085381
- Chennault, T. and Podrabsky, J. E. (2010). Aerobic and anaerobic capacities differ in embryos of the annual killifish *Austrofundulus limnaeus* that develop on alternate developmental trajectories. *J. Exp. Zool. A. Ecol. Genet. Physiol.* **313A**, 587-596. doi:10.1002/jez.632
- Coleman, S. T., Fang, T. K., Rovinsky, S. A., Turano, F. J. and Moye-Rowley, W. S. (2001). Expression of a glutamate decarboxylase homologue is required for normal oxidative stress tolerance in *Saccharomyces cerevisiae*. *J. Biol. Chem.* **276**, 244-250. doi:10.1074/jbc.M007103200
- Gilby, K., Sydserff, S. and Robertson, H. (2005). Differential neuroprotective effects for three GABA-potentiating compounds in a model of hypoxia-ischemia. *Brain Res.* **1035**, 196-205. doi:10.1016/j.brainres.2004.12.015
- Gleeson, T. T. (1985). Glycogen synthesis from lactate in skeletal muscle of the lizard *Dipsosaurus dorsalis*. *J. Comp. Physiol.* **156**, 277-284. doi:10.1007/BF00695783
- Goldlust, A., Su, T.-Z., Welty, D., Taylor, C. and Oxender, D. (1995). Effects of anticonvulsant drug gabapentin on the enzymes in metabolic pathways of glutamate and GABA. *Epilepsy Res.* **22**, 1-11. doi:10.1016/0920-1211(95)00028-9
- Hand, S. C. (1998). Quiescence in *Artemia franciscana* embryos: reversible arrest of metabolism and gene expression at low oxygen levels. *J. Exp. Biol.* **201**, 1233-1242.

- Hylland, P. and Nilsson, G. E. (1999). Extracellular levels of amino acid neurotransmitters during anoxia and forced energy deficiency in crucian carp brain. *Brain Res.* **823**, 49–58. doi:10.1016/S0006-8993(99)01096-3
- Ippolito, J. E. and Piwnica-Worms, D. (2014). A fluorescence-coupled assay for gamma aminobutyric acid (GABA) reveals metabolic stress-induced modulation of GABA content in neuroendocrine cancer. *PLoS ONE* **9**, e88667. doi:10.1371/journal.pone.0088667
- Jackson, D. (1997). Lactate accumulation in the shell of the turtle *Chrysemys picta bellii* during anoxia at 3°C and 10°C. *J. Exp. Biol.* **200**, 2295–2300.
- Jackson, D. C. and Heisler, N. (1982). Plasma ion balance of submerged anoxic turtles at 3°C: the role of calcium lactate formation. *Respir. Physiol.* **49**, 159–174. doi:10.1016/0034-5687(82)90071-8
- Jackson, D. C., Crocker, C. E. and Ullsch, G. R. (2000). Bone and shell contribution to lactic acid buffering of submerged turtles *Chrysemys picta bellii* at 3°C. *Am. J. Physiol. Regul. Integr. Comp. Physiol.* **278**, R1564–R1571. doi:10.1152/ajpregu.2000.278.6.R1564
- Jacobson, M. D. and Raff, M. C. (1995). Programmed cell death and Bcl-2 protection in very low oxygen. *Nature* **374**, 814–816. doi:10.1038/374814a0
- Johns, L., Sinclair, A. J. and Davies, J. A. (2000). Hypoxia/hypoglycemia-induced amino acid release is decreased *in vitro* by preconditioning. *Biochem. Biophys. Res. Commun.* **276**, 134–136. doi:10.1006/bbrc.2000.3443
- Jourdain, P., Allaman, I., Rothenfusser, K., Fiumelli, H., Marquet, P. and Magistretti, P. J. (2016). L-Lactate protects neurons against excitotoxicity: implication of an ATP-mediated signaling cascade. *Sci. Rep.* **6**, 1–13. doi:10.1038/srep21250
- Koppaka, V., Thompson, D. C., Chen, Y., Ellermann, M., Nicolaou, K. C., Juvonen, R. O., Petersen, D., Deitrich, R. A., Hurley, T. D. and Vasilou, V. (2012). Aldehyde dehydrogenase inhibitors: a comprehensive review of the pharmacology, mechanism of action, substrate specificity, and clinical application. *Pharmacol. Rev.* **64**, 520–539. doi:10.1124/pr.111.005538
- Kubasiak, L. A., Hernandez, O. M., Bishopric, N. H. and Webster, K. A. (2002). Hypoxia and acidosis activate cardiac myocyte death through the Bcl-2 family protein BNP3. *Proc. Natl Acad. Sci. USA* **99**, 12825–12830. doi:10.1073/pnas.202474099
- Larson, J., Drew, K. L., Folkow, L. P., Milton, S. L. and Park, T. J. (2014). No oxygen? No problem! Intrinsic brain tolerance to hypoxia in vertebrates. *J. Exp. Biol.* **217**, 1024–1039.
- Latham, T., Mackay, L., Sproul, D., Karim, M., Culley, J., Harrison, D. J., Hayward, L., Langridge-Smith, P., Gilbert, N. and Ramsahoye, B. H. (2012). Lactate, a product of glycolytic metabolism, inhibits histone deacetylase activity and promotes changes in gene expression. *Nucleic Acids Res.* **40**, 4794–4803. doi:10.1093/nar/gks066
- Lutz, P. L. and Milton, S. L. (2004). Negotiating brain anoxia survival in the turtle. *J. Exp. Biol.* **207**, 3141–3147. doi:10.1242/jeb.01056
- Lutz, P. L. and Nilsson, G. E. (2004). Vertebrate brains at the pilot light. *Respir. Physiol. Neurobiol.* **141**, 285–296. doi:10.1016/j.resp.2004.03.013
- Meller, C. L. and Podrabsky, J. E. (2013). Avoidance of apoptosis in embryonic cells of the annual killifish *Austrofundulus limnaeus* exposed to anoxia. *PLoS ONE* **8**, e75837. doi:10.1371/journal.pone.0075837
- Meller, C. L., Meller, R., Simon, R. P., Culpepper, K. M. and Podrabsky, J. E. (2012). Cell cycle arrest associated with anoxia-induced quiescence, anoxic preconditioning, and embryonic diapause in embryos of the annual killifish *Austrofundulus limnaeus*. *J. Comp. Physiol. B* **182**, 909–920. doi:10.1007/s00360-012-0672-9
- Morgan, C. A., Parajuli, B., Buchman, C. D., Dria, K. and Hurley, T. D. (2015). N,N-diethylaminobenzaldehyde (DEAB) as a substrate and mechanism-based inhibitor for human ALDH isoenzymes. *Chem-Biol. Interact.* **234**, 18–28. doi:10.1016/j.cbi.2014.12.008
- Nilsson, G. E. (1992). Evidence for a role of GABA in metabolic depression during anoxia in crucian carp (*Carassius carassius*). *J. Exp. Biol.* **164**, 243–259.
- Nilsson, G. E. and Lutz, P. L. (1991). Release of inhibitory neurotransmitters in response to anoxia in turtle brain. *Am. J. Physiol. Regul. Integr. Comp. Physiol.* **261**, R32–R37. doi:10.1152/ajpregu.1991.261.1.R32
- Nilsson, G. E. and Lutz, P. L. (2004). Anoxia tolerant brains. *J. Cereb. Blood Flow Metab.* **24**, 475–486. doi:10.1097/00004647-200405000-00001
- Nilsson, G. E. and Renshaw, G. M. C. (2004). Hypoxic survival strategies in two fishes: extreme anoxia tolerance in the North European crucian carp and natural hypoxic preconditioning in a coral-reef shark. *J. Exp. Biol.* **207**, 3131–3139. doi:10.1242/jeb.00979
- Nilsson, G. E., Lutz, P. L. and Jackson, T. L. (1991). Neurotransmitters and anoxic survival of the brain: a comparison of anoxia-tolerant and anoxia-intolerant vertebrates. *Physiol. Zool.* **64**, 638–652. doi:10.1086/physzool.64.3.30158198
- Pamenter, M. E., Hogg, B., Ormond, J., Shin, D. S., Woodin, M. A. and Buck, L. T. (2011). Endogenous GABA<sub>A</sub> and GABA<sub>B</sub> receptor-mediated electrical suppression is critical to neuronal anoxia tolerance. *Proc. Natl. Acad. Sci. USA* **108**, 11274–11279. doi:10.1073/pnas.1102429108
- Podrabsky, J. E. (1999). Husbandry of the annual killifish *Austrofundulus limnaeus* with special emphasis on the collection and rearing of embryos. *Environ. Biol. Fishes* **54**, 421–431. doi:10.1023/A:1007598320759
- Podrabsky, J. E. and Hand, S. C. (1999). The bioenergetics of embryonic diapause in an annual killifish, *Austrofundulus limnaeus*. *J. Exp. Biol.* **202**, 2567–2580.
- Podrabsky, J. E. and Hand, S. C. (2000). Depression of protein synthesis during diapause in embryos of the annual killifish *Austrofundulus limnaeus*. *Physiol. Biochem. Zool.* **73**, 799–808. doi:10.1086/318106
- Podrabsky, J. E., Hrbek, T. and Hand, S. C. (1998). Physical and chemical characteristics of ephemeral pond habitats in the Maracaibo basin and Llanos region of Venezuela. *Hydrobiologia* **362**, 67–78. doi:10.1023/A:1003168704178
- Podrabsky, J. E., Garrett, I. D. F. and Kohl, Z. F. (2010). Alternative developmental pathways associated with diapause regulated by temperature and maternal influences in embryos of the annual killifish *Austrofundulus limnaeus*. *J. Exp. Biol.* **213**, 3280–3288. doi:10.1242/jeb.045906
- Podrabsky, J. E., Lopez, J. P., Fan, T. W. M., Higashi, R. and Somero, G. N. (2007). Extreme anoxia tolerance in embryos of the annual killifish *Austrofundulus limnaeus*: insights from a metabolomics analysis. *J. Exp. Biol.* **210**, 2253–2266. doi:10.1242/jeb.005116
- Podrabsky, J. E., Menze, M. A. and Hand, S. C. (2012a). Long-term survival of anoxia despite rapid ATP decline in embryos of the annual killifish *Austrofundulus limnaeus*. *J. Exp. Zool. A. Ecol. Genet. Physiol.* **317**, 524–532. doi:10.1002/jez.1744
- Podrabsky, J. E., Riggs, C. L. and Duerr, J. M. (2012b). Anoxia tolerance during vertebrate development – insights from studies on the annual killifish *Austrofundulus limnaeus*. In *Anoxia* (ed. P. Padilla), pp. 3–24. Rijeka, Croatia: InTech.
- Podrabsky, J., Riggs, C. and Wagner, J. (2016). Tolerance of environmental stress. In *Annual Fishes. Life History Strategy, Diversity, and Evolution* (ed. N. Berois, G. García and R. De Sá), pp. 159–184. Boca Raton, FL, USA: CRC Press, Taylor & Francis.
- Podrabsky, J., Riggs, C., Romney, A., Woll, S., Wagner, J., Culpepper, K. and Cleaver, T. (2017). Embryonic development of the annual killifish *Austrofundulus limnaeus*: an emerging model for ecological and evolutionary developmental biology research and instruction. *Dev. Dyn.* **246**, 779–801. doi:10.1002/dvdy.24513
- Prentice, H. M. (2009). The major contribution of brain GABAergic function to anoxic survival. *Physiol. Genomics* **36**, 59–60. doi:10.1152/physiolgenomics.90380.2008
- Pri-Tal, B. M., Blue, S., Pau, F. K.-Y. and Podrabsky, J. E. (2011). Hormonal components of altered developmental pathways in the annual killifish, *Austrofundulus limnaeus*. *Gen. Comp. Endocrinol.* **174**, 166–174. doi:10.1016/j.ygcen.2011.08.016
- Qume, M. and Fowler, L. (1997). Effect of chronic treatment with the GABA transaminase inhibitors  $\gamma$ -vinyl GABA and ethanolamine O-sulphate on the *in vitro* GABA release from rat hippocampus. *Br. J. Pharmacol.* **122**, 539–545. doi:10.1038/sj.bj.0701383
- Riggs, C. and Podrabsky, J. (2017). Small noncoding RNA expression during extreme anoxia tolerance of annual killifish (*Austrofundulus limnaeus*) embryos. *Physiol. Genomics* **49**, 505–518. doi:10.1152/physiolgenomics.00016.2017
- Riggs, C., Summers, A., Warren, D., Nilsson, G., Lefevre, S., Dowd, W., Milton, S. and Podrabsky, J. (2018). Small non-coding RNA expression and extreme vertebrate anoxia tolerance. *Front. Genet.* **9**, 230. doi:10.3389/fgene.2018.00230
- Romney, A. and Podrabsky, J. (2017). Transcriptomic analysis of maternally provisioned cues for phenotypic plasticity in the annual killifish, *Austrofundulus limnaeus*. *EvoDevo* **8**, 6. doi:10.1186/s13227-017-0069-7
- Romney, A., Davis, E., Corona, M., Wagner, J. and Podrabsky, J. (2018). Temperature dependent vitamin D signaling regulates developmental trajectory associated with diapause in an annual killifish. *Proc. Natl. Acad. Sci. USA* **115**, 12763–12768. doi:10.1073/pnas.1804590115
- Saikumar, P., Dong, Z., Weinberg, J. M. and Venkatachalam, M. A. (1998). Mechanisms of cell death in hypoxia/reoxygenation injury. *Oncogene* **17**, 3341–3349. doi:10.1038/sj.onc.1202579
- Schieber, M. and Chandel, N. S. (2014). ROS function in redox signaling and oxidative stress. *Curr. Biol.* **24**, R453–R462. doi:10.1016/j.cub.2014.03.034
- Schwartz-Bloom, R. D. and Sah, R. (2001).  $\gamma$ -Aminobutyric acid<sub>A</sub> neurotransmission and cerebral ischemia. *J. Neurochem.* **77**, 353–371. doi:10.1046/j.1471-4159.2001.00274.x
- Sloley, B., Trudeau, V., Dantonio, M. and Peter, R. (1994). Persistent elevation of tissue GABA and serum gonadotropin concentrations by GABA transaminase inhibition in goldfish (*Carassius auratus*). *Endocrine* **2**, 385–391.
- Tauffmanberger, A., Fiumelli, H., Almustafa, S. and Magistretti, P. J. (2019). Lactate and pyruvate promote oxidative stress resistance through hormetic ROS signaling. *Cell Death Dis.* **10**, 1–16. doi:10.1038/s41419-019-1877-6
- Thompson, J. W., Nilsson, G. E. and Perez-Pinzon, M. A. (2013). Anoxia resistance in lower and higher vertebrates. In *Innate Tolerance in the CNS* (ed. J. Gidday, M. Perez-Pinzon and J. Zhang), pp. 19–35. Springer.
- Tsukatan, T., Higuchi, T. and Matsumoto, K. (2005). Enzyme-based microtiter plate assay for  $\gamma$ -aminobutyric acid: application to the screening of  $\gamma$ -aminobutyric acid-producing lactic acid bacteria. *Anal. Chim. Acta* **540**, 293–297. doi:10.1016/j.aca.2005.03.056
- Wagner, J., Singh, P., Romney, A., Riggs, C., Minx, P., Woll, S., Roush, J., Warren, W., Brunet, A. and Podrabsky, J. (2018). The genome of *Austrofundulus limnaeus* offers insights into extreme vertebrate stress tolerance

- and embryonic development. *BMC Genomics* **19**, 155. doi:10.1186/s12864-018-4539-7
- Wagner, J. T., Knapp, M. J. and Podrabsky, J. E.** (2019). Antioxidant capacity and anoxia tolerance in *Austrofundulus limnaeus* embryos. *J. Exp. Biol.* **222**, jeb204347. doi:10.1242/jeb.204347
- Wolf, R. and Klemisch, H.** (1991). Adaptation of an enzymatic fluorescence assay for L-glutamic acid decarboxylase. *Anal. Biochem.* **192**, 78-81. doi:10.1016/0003-2697(91)90187-X
- Woll, S. and Podrabsky, J.** (2017). Insulin-like growth factor signaling regulates developmental trajectory associated with diapause in embryos of the annual killifish *Austrofundulus limnaeus*. *J. Exp. Biol.* **220**, 2777-2786. doi:10.1242/jeb.151373
- Wourms, J. P.** (1972a). The developmental biology of annual fishes I. Stages in the normal development of *Austrofundulus myersi* Dahl. *J. Exp. Zool.* **182**, 143-168. doi:10.1002/jez.1401820202
- Wourms, J. P.** (1972b). The developmental biology of annual fishes III. Pre-embryonic and embryonic diapause of variable duration in the eggs of annual fishes. *J. Exp. Zool.* **182**, 389-414. doi:10.1002/jez.1401820310
- Wu, Y., Wang, W. and Richerson, G. B.** (2001). GABA transaminase inhibition induces spontaneous and enhances depolarization-evoked GABA efflux via reversal of the GABA transporter. *J. Neurosci.* **21**, 2630-2639. doi:10.1523/JNEUROSCI.21-08-02630.2001
- Zhang, D., Tang, Z., Huang, H., Zhou, G., Cui, C., Weng, Y., Liu, W., Kim, S., Lee, S. and Perez-Neut, M.** (2019). Metabolic regulation of gene expression by histone lactylation. *Nature* **574**, 575-580. doi:10.1038/s41586-019-1678-1
- Zhang, Y., Vanmeert, M., Siekierska, A., Ny, A., John, J., Callewaert, G., Lesclerier, E., Dehaen, W., de Witte, P. A. and Kaminski, R. M.** (2017). Inhibition of glutamate decarboxylase (GAD) by ethyl ketopentenoate (EKP) induces treatment-resistant epileptic seizures in zebrafish. *Sci. Rep.* **7**, 1-13. doi:10.1038/s41598-016-0028-x
